1 **Flexible reprogramming of *Pristionchus pacificus* motivation for attacking *Caenorhabditis***  
2 ***elegans* in predator-prey competition**

3 Kathleen T. Quach<sup>1,2</sup> & Sreekanth H. Chalasani<sup>1,2\*</sup>

4 <sup>1</sup>Neurosciences Graduate Program, University of California San Diego, La Jolla, CA 92037,  
5 USA.

6 <sup>2</sup>Molecular Neurobiology Laboratory, Salk Institute for Biological Studies, La Jolla, CA 92037,  
7 USA.

8 \*Correspondence: [schallasani@salk.edu](mailto:schallasani@salk.edu)

9 **Summary**

10 Animals with diverse diets must adapt their food priorities to a wide variety of environmental  
11 conditions. This diet optimization problem is especially complex for predators that compete with  
12 prey for food. Although predator-prey competition is widespread and ecologically critical, it  
13 remains difficult to disentangle predatory and competitive motivations for attacking competing  
14 prey. Here, we dissect the foraging decisions of the omnivorous nematode *Pristionchus pacificus*  
15 to reveal that its seemingly failed predatory attempts against *Caenorhabditis elegans* are actually  
16 motivated acts of efficacious territorial aggression. While *P. pacificus* easily kills and eats larval  
17 *C. elegans* with a single bite, adult *C. elegans* typically survives and escapes from bites.  
18 However, nonfatal biting can provide competitive benefits by reducing access of adult *C. elegans*  
19 and its progeny to bacterial food that *P. pacificus* also eats. We show that *P. pacificus* considers  
20 costs and benefits of both predatory and territorial outcomes to decide which food goal, prey or  
21 bacteria, should guide its motivation for biting. These predatory and territorial motivations  
22 impose different sets of rules for adjusting willingness to bite in response to changes in bacterial  
23 abundance. In addition to biting, predatory and territorial motivations also influence which  
24 search tactic *P. pacificus* uses to increase encounters with *C. elegans*. When treated with an  
25 octopamine receptor antagonist, *P. pacificus* switches from territorial to predatory motivation for  
26 both biting and search. Overall, we demonstrate that *P. pacificus* assesses alternate outcomes of  
27 attacking *C. elegans* and flexibly reprograms its foraging strategy to prioritize either prey or  
28 bacterial food.

29 **Keywords**

30 *Pristionchus pacificus*, *Caenorhabditis elegans*, intraguild predation, foraging, territoriality,  
31 predation, behavioral flexibility, dopamine D2 receptors, octopamine receptors

32 **Introduction**

33 Animals that exploit diverse food resources are more resilient to suboptimal environmental  
34 conditions than animals with specialized diets<sup>1,2</sup>. To fully benefit from versatile diets, animals  
35 must judge which food types and quantities maximize the ratio of energy intake to energy costs.  
36 Emphasis on calorie-rich and abundant foods is a sufficient strategy when foods are static and  
37 encountered one at a time<sup>3</sup>, but diet decisions are often conducted in more complex  
38 environments. For example, travel time to and between foods should also be minimized when  
39 multiple foods are simultaneously encountered<sup>4,5</sup>. When hunting mobile prey, predators should  
40 select prey that are easy to capture and pursue<sup>6</sup>. In addition to directly securing and eating foods,  
41 animals can indirectly prioritize foods by interfering with the ability of competitors to access  
42 those foods. However, little is known about the strategies that guide foragers when all these  
43 factors combine to produce a complex but naturalistic foraging problem in which a predator  
44 competes with prey for another food.

45 For predators that consume foods from different trophic levels, prey may consume and  
46 directly reduce the abundance of another of the predator's food choices. This predator-prey  
47 competition (intraguild predation) is a widespread trophic motif in many food webs<sup>7</sup>, and its  
48 emergent effects on population dynamics and biodiversity remain widely researched and  
49 debated<sup>8,9</sup>. Here, killing prey simultaneously achieves dual food benefits by enabling  
50 consumption of prey corpses and reducing competition for shared food resources<sup>8,10</sup>. However, it  
51 is often unclear which of these predatory and competitive benefits is the dominant motivation for  
52 attacking competing prey. Evidence against predatory motivation comes from studies showing  
53 that corpses of competing prey are left uneaten more often than those of "true" prey that don't  
54 compete with the predator<sup>11,12,13,14</sup>. Using similar logic to argue the opposite, studies that dismiss  
55 competitive motivation show that aggressive threat displays were absent against competing prey  
56 but frequently presented to intraspecific (non-prey) competitors<sup>15</sup>. However, killing prey without  
57 feeding can still indirectly promote predation<sup>16</sup>, and threat displays are not always needed in

58 competitive fights<sup>17</sup>. To resolve these conflicting results and disentangle the motivations that  
59 drive a predator to attack a competing prey, more definitive and positive indicators are needed.

60 The predatory nematode *Pristionchus pacificus* (Figure 1A), its competing prey  
61 *Caenorhabditis elegans* (Figures 1B and 1C), and a shared bacterial food comprise a convenient  
62 laboratory system for investigating factors that influence an omnivorous predator's diet  
63 decisions<sup>18</sup>. *P. pacificus* prefers to eat bacteria but can also use its teeth (Figures S1A and S1B)  
64 to attack and eat *C. elegans*<sup>19,20</sup>. In contrast, *C. elegans* lacks teeth (Figure S1C) and almost  
65 exclusively feeds on bacteria. To feed on *C. elegans*, *P. pacificus* must pierce the cuticle to  
66 access and ingest the internal pseudocoelomic fluid, thereby causing *C. elegans* death. While  
67 larvae are typically killed by a single bite (Figures 1D and 1E; Video S1), adult *C. elegans* are  
68 rarely killed and easily escape *P. pacificus* bites (Figures 1F and 1G; Video S2). Since nonfatal  
69 bites may be failed predatory attempts, this precludes the use of prey-feeding (which is only  
70 possible in successful predation) as a behavioral indicator of predatory motivation. Furthermore,  
71 nonfatal bites are executed similarly to bites that consummate in feeding, with no discernable  
72 threat displays that may suggest competitive motivation. Here, we deconstruct *P. pacificus*  
73 foraging decisions to show that nonfatal adult-targeted bites are not failed predatory attempts, but  
74 are instead goal-directed acts of aggression to expel competitors from a bacterial territory.  
75 Overall, we demonstrate that *P. pacificus* conducts cost-benefit analyses to flexibly switch  
76 between and adjust predatory and territorial strategies for biting *C. elegans*.

## 77 **Results**

### 78 **Nonfatal biting compels adult *C. elegans* to avoid bacteria occupied by *P. pacificus***

79 To identify the different functions that *P. pacificus* may associate with biting, we first probed the  
80 immediate outcomes of biting *C. elegans* in the absence and presence of bacterial food. We  
81 assessed the ability of *P. pacificus* to kill *C. elegans* by confining them together in a small arena  
82 without any other food source, and then measuring how often individual bites resulted in fatality.  
83 We found that bites targeted at larval *C. elegans* mostly resulted in kills, while bites targeted at  
84 adult *C. elegans* rarely killed (Figures 1H and S1D). Even when allowed to focus all of its bites  
85 onto a single target, a single *P. pacificus* took ~ 6 hours (Figures 1I and S1E) and ~25 bites  
86 (Figure S1F) to kill adult *C. elegans*. Next, we analysed bites that occurred on bacterial patches  
87 (Figures S1G to S1L) to probe the potential use of biting for defending food territory. Most

88 larva-targeted bites led to feeding on prey, regardless of whether bacteria were absent or present  
89 (Figures 1J and S1M). Since, *P. pacificus* biting rarely kills adult *C. elegans* and therefore rarely  
90 leads to prey-feeding, we instead monitored how often a bite led to adult *C. elegans* exiting a  
91 bacterial patch. The majority of adult-targeted bites that occurred on bacteria expelled adult *C.*  
92 *elegans* from a bacterial patch (Figures 1K and S1N; Video S3). Since successful predation also  
93 eliminates competition, larva-targeted biting simultaneously achieves both predatory and  
94 territorial benefits with relative ease. In adult-targeted biting, predation is rare and labor-  
95 intensive, but expulsion of intruders from bacteria can be achieved without killing.

96 To explore the long-term effects of nonfatal biting on adult *C. elegans* patch-leaving  
97 behavior, we placed adult *C. elegans* with or without *P. pacificus* for 6 hours on a small bacterial  
98 patch. With *P. pacificus* absent, adult *C. elegans* animals spent almost all of their time with their  
99 bodies fully inside the bacterial patch (Figure 1L). Upon initial exposure to *P. pacificus*, adult *C.*  
100 *elegans* still spent most of its time fully inside the lawn, though less than when *P. pacificus* was  
101 absent (Figures 1L and S2A). After 6 hours of predator exposure, *C. elegans* almost completely  
102 avoided fully entering the bacterial patch (Figures 1L), opting instead to insert only its head  
103 inside the patch (Figures 1M, S2B, and S2C). Additionally, the average time that adult *C.*  
104 *elegans* spent avoiding the lawn after each bite increased fivefold (Figure 1N), suggesting that  
105 adult *C. elegans* was conditioned at 6 hours to associate the bacterial patch with danger.  
106 Therefore, long-term nonfatal biting of adult *C. elegans* induces persistent avoidance of bacteria  
107 that is energetically efficient for *P. pacificus* to maintain.

### 108 **Progeny of predator-exposed adult *C. elegans* experience reduced access to bacteria**

109 In order for nonfatal biting to have meaningful territorial benefits for *P. pacificus*, the relative  
110 fitness of *P. pacificus* would have to be higher than that of *C. elegans*. We speculated that biting-  
111 induced patch avoidance would force adult *C. elegans* to lay eggs away from bacteria. To test  
112 this, we developed an egg distribution assay (Figures 2A, and S2D to S2G) to measure where  
113 eggs were laid relative to a small bacterial patch over a 7-hour period (before eggs hatched).  
114 When *C. elegans* or *P. pacificus* adults laid eggs separately from each other, most eggs were  
115 deposited inside the patch, indicating absence of within-species territoriality (Figures 2B and  
116 2C). In mixed groups, however, *C. elegans* was more likely to lay eggs off the patch as number  
117 of *P. pacificus* adults increased (Figure 2D), shifting the spatial distribution of *C. elegans* eggs

118 away from the patch (likelihood ratio test on linear mixed-effects model,  $\chi^2 = 42.594$ ,  $df = 3$ ,  $p =$   
119  $3.001e-09$ ; Figures 2B, 2C, and 2E). Meanwhile, *P. pacificus* egg distribution was unaffected by  
120 the mix of adult *P. pacificus* and adult *C. elegans* (likelihood ratio test on linear mixed-effect  
121 model,  $\chi^2 = 5.1518$ ,  $df = 3$ ,  $p = 0.161$ ; Figures 2B and 2C). The number of eggs laid per adult *C.*  
122 *elegans* remained unchanged (Figure S2H), indicating that *P. pacificus* rarely eats *C. elegans*  
123 eggs. Thus, biting interferes with *C. elegans* preference for laying eggs within bacteria.

124 We next asked whether newly hatched *C. elegans* larvae would struggle to find a distant  
125 small bacterial patch. Since failure to find food within 36 hours induces arrested reproductive  
126 development in larval *C. elegans* ('dauer' state)<sup>21</sup>, we gently placed larvae (cleaned of bacteria)  
127 at various distances from a small bacterial patch and counted how many found the patch within  
128 36 hours (see Methods: Patch-finding). At 10 mm starting distance away from the patch, larvae  
129 had only a ~0.5 probability of finding the patch, with lower probabilities at greater starting  
130 distances (Figure 2F). To verify that biting causes adult *C. elegans* to lay eggs at these  
131 unfavorable distances, we spatially and temporally extended the egg distribution assay to 100  
132 mm and 36 hours, respectively (Figure 2G). With *P. pacificus* present, the number of *C. elegans*  
133 larvae within 10 mm of the bacterial patch reduced to less than half of the number observed  
134 when predators were absent (Figure 2H). While *C. elegans* were typically more prolific than *P.*  
135 *pacificus* (Figure S2H), *P. pacificus* progeny outnumbered *C. elegans* progeny within 10 mm of  
136 the bacterial patch (Figure 2H). Altogether, these results illustrate how nonfatal biting accrues  
137 long-term territorial benefits and increases *P. pacificus* fitness relative to that of *C. elegans*.

### 138 ***P. pacificus* inflicts non-fatal biting to achieve territorial outcomes**

139 While we have thus far shown that nonfatal biting of adult *C. elegans* provides territorial  
140 benefits, it remains to be shown whether these territorial benefits are goal-directed or a  
141 serendipitous consolation prize of botched predation. To assess food values, we first analysed at  
142 the long-term net energy yield of various single-food diets. *P. pacificus* were allowed to feed  
143 freely on excess bacteria (*E. coli* OP50), larval *C. elegans*, or adult *C. elegans* for 6 hours before  
144 being stained for fat stores with the lipophilic dye Oil Red O (see Methods: Oil Red O staining).  
145 *P. pacificus* fed with bacteria displayed the most stained fat, followed by adult-fed and then  
146 larva-fed *P. pacificus* (Figures 3A and S3A to S3D). Thus, bacteria-based diets are associated

147 with higher energy yields than prey-based diets. Further, given enough time for successful  
148 predation, a diet comprised of adult *C. elegans* is more efficient than a larva-based diet.

149 Although adult prey is more valuable than larval prey in the long term, *P. pacificus* may  
150 discount delayed rewards<sup>22</sup> to avoid food deprivation. To assess short-term food preference, we  
151 placed *P. pacificus* in one of two plentiful, neighboring food patches and then checked whether  
152 *P. pacificus* switched to the alternative food patch after an hour (see Methods: Food switching).  
153 By comparing switching probabilities, we found that *P. pacificus* prefers bacteria over all prey,  
154 and larval prey over adult prey (Figure 3B). Preference for bacteria over larvae is consistent with  
155 previous findings<sup>20</sup>. Contrary to long-term food value (Figure 3A), *P. pacificus* preferred larval  
156 over adult prey (Figure 3B). Notably, inverse switches (a→b, b→a) had combined probabilities  
157 less than 1 (Figure 3B), which is consistent with previous reports that nematodes tend to stay  
158 within a food patch<sup>23</sup>, and with foraging theory that discounts food value by the time it takes to  
159 travel to food<sup>4,5</sup>. Overall, preference for easily consumed foods and for closer foods suggest that  
160 *P. pacificus* prefers immediate over delayed food rewards.

161 We next explored the potential competitive benefits associated with the territorial  
162 outcome of biting. To compare their ability to exploit bacteria, we placed an adult *C. elegans* and  
163 an adult *P. pacificus* onto separate identical patches of GFP-labelled bacteria, and then measured  
164 bacterial fluorescence at 12 and 24 hours. We found that adult *C. elegans* consumed bacteria  
165 ~1.5x faster than adult *P. pacificus* at both time points (Figure 3C). Eggs laid by adult *C. elegans*  
166 began hatching at 12 hours, with a range of 20 to 62 larvae present by 24 hours (Figures S3E and  
167 S3F). However, bacterial consumption rate does not increase between 12 and 24 hours (Figure  
168 3C), and we found no correlation between number of larvae and bacteria consumed (Pearson's  $r$   
169 = 0.2480,  $p = 0.8066$ ). These results show that adult *C. elegans* more efficiently exploits bacteria  
170 and may outcompete *P. pacificus* for bacteria, but larvae pose a negligible short-term  
171 competitive threat.

172 To determine the relative contributions of predatory and territorial outcomes toward the  
173 overall subjective value of biting a particular stage of *C. elegans* target (larva or adult), we  
174 applied neuroeconomic theories of how to make rational decisions about actions that have  
175 probabilistic outcomes. In expected utility theory<sup>24</sup>, the expected utility (overall subjective value)  
176 of an action takes into account both the probability that a particular outcome will occur given an  
177 action, in addition to the utility (subjective value) attained if that outcome occurs. The expected

178 utility of an action for a particular context is calculated as the sum of the utilities (subjective  
179 values) of each outcome, weighted by their respective probabilities of occurring given an action.  
180 To calculate the expected utility of biting larval or adult *C. elegans*, we would have to first  
181 determine the probability that predatory and territorial outcomes occur given a bite, as well as  
182 how utility of those outcomes changes with bacterial abundance.

183 First, we contrived food choices such that *P. pacificus* only encounters larval *C. elegans*  
184 or only adult *C. elegans*, so that the decision is between biting outcomes, rather than between  
185 different prey options (Figure 3D). We then assigned probabilities to each biting outcome, for  
186 each type of *C. elegans* target (Figure 3D). After biting either larval or adult *C. elegans*, we  
187 assumed that a bite can lead to two possible outcomes: the predatory outcomes leads to feeding  
188 on prey, while the territorial outcome eliminates competitors for bacterial food (Figure 3D). For  
189 biting larval *C. elegans*, we set both  $p(\text{predatory outcome}/\text{bite})$  and  $p(\text{territorial outcome}/\text{bite})$  as  
190 equal to the pooled probability that a bite leads to feeding on larva ( $p(\text{feed}/\text{bite})= 0.8115$ ; Figure  
191 S1M), since feeding on larvae simultaneously eliminates competitors (Figure 3D). For biting  
192 adult *C. elegans*, we assigned  $p(\text{predatory outcome}/\text{bite})$  a very low probability (see Methods:  
193 Expected utility of biting) since adult *C. elegans* is rarely killed by a *P. pacificus* bite (Figures  
194 1H, 1I, and S1F). In contrast, we assigned  $p(\text{territorial outcome}/\text{bite})$  as equal to the pooled  
195 probability that a bite expels adult *C. elegans* from a bacterial patch ( $p(\text{expel}/\text{bite}) = 0.6483$ ;  
196 Figure S1N).

197 Next, we determined how the utility of predatory or territorial outcomes changes with  
198 bacterial abundance. We subdivided bacterial abundance into three behaviorally defined  
199 subranges: 1) in the ‘negligible’ subrange, *P. pacificus* considers bacteria too meager or absent to  
200 exploit, 2) in the ‘scarce’ subrange, *P. pacificus* exploits bacteria, but must bite to increase food  
201 supply, and 3) in the ‘plentiful’ subrange, *P. pacificus* has excess bacterial food and therefore  
202 does not need to bite to secure supplementary food. The bounds of these subranges should shift  
203 depending on whether the intended biting outcome is predatory or territorial, and on whether the  
204 *C. elegans* target is larva or adult. In particular, we are interested in how outcome values in the  
205 scarce subrange compare to those in the negligible and plentiful subranges.

206 We first described the general shape of how the utility of predatory biting outcomes (for  
207 both larval and adult *C. elegans* targets) should change with bacterial abundance (Figure 3D).  
208 Since the goal of predation is to kill prey for food, the value of predatory biting outcomes should

209 be highest when bacterial abundance is negligible, and then monotonically decrease as the  
210 abundance of its preferred food, bacteria, increases (Figure 3D). This is consistent with previous  
211 reports that *P. pacificus* bites larvae less when bacteria are present than when absent<sup>20</sup>. We used  
212 ORO fat-staining of prey relative to bacteria (Figure 3A) to estimate predatory biting value over  
213 the negligible subrange, and probabilities of switching from prey to bacteria (Figure 3B) to  
214 estimate the rate at which predatory value degrades over the scarce subrange as bacterial  
215 abundance increases (see Methods: Expected utility of biting). By definition, the plentiful  
216 subrange begins where the utility of predatory biting outcomes reaches zero. Even though the  
217 utility of predatory biting outcomes is higher for adult prey than for larval prey over the  
218 negligible subrange, *P. pacificus* should drop adult prey from its diet at a lower bacterial  
219 abundance than for larval prey due to preference for immediate food rewards (Figure 3D).

220 In contrast to the utility of predatory biting outcomes, we characterized the utility of  
221 territorial biting outcomes (for both larval and adult *C. elegans* targets) as generally having a  
222 non-monotonic shape and a sharp peak (Figure 3D). Under the goal of territoriality, biting should  
223 remove competitors from a bacterial territory to indirectly prioritize bacterial food. Over the  
224 negligible subrange, bacteria are absent or not worth defending, and therefore the utility of  
225 territorial outcomes should be zero (Figure 3D). As the negligible subrange transitions to the  
226 lower bound of the scarce subrange, scarcity-induced competitive pressure is strongest and  
227 should induce a sudden peak in the utility of territorial outcomes (Figure 3D). From there, utility  
228 of territorial outcomes should monotonically decrease as bacterial abundance increases (Figure  
229 3D). This territorial value function is similar to previous energy cost models of feeding-based  
230 territoriality<sup>25</sup>. We used *C. elegans* consumption rate of bacteria relative to that of *P. pacificus*  
231 (Figure 3C) to estimate peak territorial biting values (see Methods: Expected utility of biting).  
232 Additionally, we predicted that the territorial scarce subranges would be wider than predatory  
233 scarce subranges, due to bacterial loss to competitors (Figure 3D, see Methods: Expected utility  
234 of biting). Accordingly, the territorial plentiful subrange begins at a higher bacterial abundance  
235 compared to predatory plentiful subrange, and represents excess bacterial abundance that  
236 accommodates both *P. pacificus* and adult *C. elegans* (Figure 3D). Notably, predatory and  
237 territorial value functions have similar shapes across scarce and plentiful subranges, but differ in  
238 whether the value over the negligible subrange is higher or lower than adjacent values in the  
239 scarce subrange (Figure 3D). It is important to note that the model in Figure 3D only specifies



240 the shape of biting incentive by predicting 1) the direction of change across bacterial abundance  
241 subranges, particularly compared to when bacteria is negligible, 2) monotonic decrease across  
242 the scarce subrange, 3) higher peak expected utility of biting for adult *C. elegans* target, and 4)  
243 wider scarce subrange for biting of adult *C. elegans*.

244 For each combination of outcome type (predatory or territorial) and *C. elegans* target  
245 (larval or adult), we multiplied the outcome probability,  $p(\text{outcome}/\text{bite})$ , by its corresponding  
246 outcome utility function ( $\text{utility}/\text{bite}$ ) (Figure 3D). The expected utility of biting a particular stage  
247 of *C. elegans* is then estimated as the sum of the probability-weighted utilities for both predatory  
248 and territorial outcomes, such that expected utility of biting as both a predatory component and a  
249 territorial component (Figure 3D). Therefore, the outcome with the higher probability-weighted  
250 utility should be the primary contributor towards biting motivation. For biting larval *C. elegans*,  
251 the predatory outcome should be prioritized due to low competitive pressure from larvae (Figure  
252 3D). For biting adult *C. elegans*, the territorial outcome should be prioritized due to the low  
253 probability of killing adult prey (Figure 3D).

254 Next, we tested our predictions to determine whether *P. pacificus* considers both  
255 predatory and territorial outcomes, or only predatory outcomes, to make goal-directed biting  
256 choices. We used the probability that *P. pacificus* bites *C. elegans* given an encounter,  
257  $p(\text{bite}/\text{encounter})$ , to quantify biting incentive. We placed *P. pacificus* in an arena with either  
258 larval or adult *C. elegans*, and varied bacterial abundance by changing the size or density of a  
259 bacterial patch (Figures S1G to S1L). We then used the shape of how biting incentive changed  
260 with bacterial abundance to infer whether prey or bacteria are the intended food goal of biting.  
261 As predicted, we observed that larva-targeted biting incentive monotonically decreased as  
262 bacterial abundance increased (Spearman's  $\rho = -0.58$ ,  $p < 0.001$ ; Figure 3E), resembling the  
263 predicted shape of the predatory component of expected utility of biting larval *C. elegans* (Figure  
264 3D). By contrast, adult-targeted biting incentive was low when bacteria were negligible and high  
265 when bacteria were scarce (Figure 3F), which conforms with the predicted non-monotonic shape  
266 (Spearman's  $\rho = 0.08$ ,  $p = 0.374$ ; Hoeffding's  $D = 0.03$ ,  $p < 0.001$ ) of the territorial component  
267 of the expected utility of biting adult *C. elegans* (Figure 3D). However, adult-targeted biting  
268 exhibited monotonic decrease with increasing bacterial abundance when only on-patch bacterial  
269 conditions were considered (Spearman's  $\rho = -0.74$ ,  $p < 0.001$ ; Figure 3F). Importantly, adult-  
270 targeted biting incentive diminishes at a higher bacterial abundance than larva-targeted biting

271 incentive (Figure 3E and 3F), consistent with our prediction of a wider scarce subrange for adult-  
272 targeted territorial value. To examine the critical bacterial abundance threshold between  
273 negligible and scarce subranges (Figure 3D), we used a low-density bacterial patch (Figure S1H)  
274 that induced patch-staying and patch-leaving with roughly equal probabilities (Figure S4A, and  
275 Videos S4 and S5). Using a choice variability approach for probing decision-making<sup>26</sup>, we  
276 segregated encounters into off- and on-patch events to reflect *P. pacificus* decision to ignore or  
277 exploit the patch, respectively. Off- and on-patch biting incentive were not significantly different  
278 for larva-targeted bites (Wald test with single-step adjustment for Tukey contrasts,  $p = 0.07663$ ;  
279 Figure 3E), while on-patch biting incentive was higher for adult-targeted bites (Figure 3F).  
280 Collectively, these results show that *P. pacificus* considers both predatory and territorial biting  
281 outcomes in a context-specific manner, and incorporates both *C. elegans* and bacterial  
282 information to direct predatory attacks against larval *C. elegans* and territorial aggression against  
283 adults.

284

### 285 **Territorial biting is driven by chemosensation and mechanosensation of bacteria**

286 We next explored how *P. pacificus* senses bacteria for adjusting territorial biting incentive.  
287 While predatory biting could be suppressed only by increasing the density of smallest-sized  
288 bacterial patch (1 mm) (ANOVA; density:  $F = 17.84$ ,  $df = 3$ ,  $p < 0.0001$ ; diameter:  $F = 22.19$ ,  $df$   
289  $= 2$ ,  $p = 0.168$ ; Figure 3E), suppression of territorial biting required increasing both density and  
290 diameter of the bacterial patch (ANOVA; density:  $F = 11.668$ ,  $df = 3$ ,  $p < 0.0001$ ; diameter:  $F =$   
291  $1.838$ ,  $df = 2$ ,  $p < 0.0001$ ; Figure 3F). This suggests that *P. pacificus* senses at least two features  
292 of bacteria that are relevant for territorial biting decisions. To identify a role for chemosensation,  
293 we ablated bilateral pairs of amphid neurons that have exposed cilia at the *P. pacificus* nose  
294 (Figure 4A). Relative to mock controls, ablation of ASH and AWC neurons decreased biting  
295 incentive against adult *C. elegans* on a medium-density, 1 mm bacterial patch, while ablation of  
296 ADL neurons increased biting incentive (Figure 4B). Although these neurons are poorly  
297 understood in *P. pacificus*, studies of homologous neurons in *C. elegans* do offer some clues.  
298 The olfactory neuron AWC triggers local search behavior upon removal from a bacterial patch<sup>27</sup>,  
299 and also senses bacteria-related odorants<sup>28,29</sup>. In *C. elegans*, ASH and ADL are involved in  
300 avoiding high ambient oxygen<sup>30,31</sup> and migrating to the thick boundary of a bacterial patch,  
301 where local oxygen concentration is lower due to higher bacterial metabolism<sup>27</sup>. Recent studies

302 report that *P. pacificus* can similarly distinguish between oxygen levels<sup>32</sup> (albeit via different  
303 molecular mechanisms<sup>33</sup>), and mutants with cilia-defective amphid neurons exhibit impaired  
304 oxygen responses<sup>34</sup>.

305 In addition to chemosensation, we also probed how mechanosensation of bacteria  
306 modulates territorial biting. We measured adult-targeted biting incentive on patches composed of  
307 Sephadex gel beads, whose surfaces elicit mechanosensation similar to that of bacterial  
308 surfaces<sup>35</sup>. Importantly, these beads are inedible and lack the chemical signatures of live bacteria.  
309 As with low-density bacterial patches, *P. pacificus* spent less time on a bead patch than on  
310 medium- or high-density bacterial patches (Figure S4A). On-patch biting incentive was high  
311 (Figure 4C), similar to that associated with a low-density bacterial patch of the same size (Figure  
312 3F). This high biting incentive was not suppressed in larger bead patches (Figure 4C), suggesting  
313 that increased patch size is insufficient to suppress biting incentive without some other bacterial  
314 sensory cue. *P. pacificus* decreased its residence time on a bead patch over time, opposite of  
315 what it does on a low-density bacterial patch (Figures 4D to 4F, and S4B), suggesting that eating  
316 is required to sustain patch exploitation. These results suggest that *P. pacificus* senses some  
317 minimal ‘bacterial’ abundance in these bead patches. Based on existing information about *P.*  
318 *pacificus* and its relative *C. elegans*, we surmise that sensation of bacterial odor may be used to  
319 locate a bacterial patch from afar, oxygen sensation may be used to locate the thick (oxygen-  
320 consuming) boundary of a bacterial patch, and mechanosensation may be used to detect low-  
321 density bacteria when odor and oxygen gradients are too low.

322

### 323 **Predatory and territorial biting are associated with different search tactics**

324 To further confirm that predatory and territorial motivations for biting are distinct and separable,  
325 we tested how those motivations differentially guide how *P. pacificus* searches for *C. elegans*  
326 while simultaneously exploiting a scarce bacterial patch. We first contemplated how biting  
327 motivation should influence search speed. Under predatory motivation, *P. pacificus* should  
328 minimize search costs since prey are inferior to bacteria, and there is no urgency to hunt while  
329 prey reside on the patch. Rather than increase search speed, *P. pacificus* should graze normally  
330 on bacteria and opportunistically bite and feed on prey during chance encounters. Under  
331 territorial motivation, *P. pacificus* should swiftly find and expel intruders to halt rapid loss of  
332 preferred food to adult *C. elegans*. To test these predictions, we tracked *P. pacificus*’s location

333 on a scarce bacterial patch with either *P. pacificus* or *C. elegans* cohabitants. Since both  
334 nematode species are attracted to the thick boundary of a bacterial patch<sup>36,32</sup>, we assessed *P.*  
335 *pacificus*'s incentive to search for *C. elegans* by measuring forward angular movement along the  
336 patch circumference (patrol speed, Video S6) relative to x-y movement (translational speed)  
337 (Figure 5A). We found that *P. pacificus* exhibited faster patrol and translational speed with adult  
338 *C. elegans* cohabitants than with larvae or with other *P. pacificus* (Figure 5B to 5E).  
339 Translational speed was slower with larvae than with *P. pacificus* (Figure 5E), likely due to  
340 stationary bouts of *P. pacificus* feeding on larvae. To discount these stationary bouts in speed  
341 considerations, we analyzed at the ratio of patrol speed to translational speed. This speed ratio  
342 was higher with adult *C. elegans*, signifying that *P. pacificus* directed a greater proportion of its  
343 locomotion to patrolling the patch boundary when adult *C. elegans* was present (Figure 5F).  
344 Speed ratio did not differ between patches with larvae and patches with only *P. pacificus* (Figure  
345 5F), suggesting that grazing-style feeding on bacteria motivated both exploration patterns.  
346 Moreover, *P. pacificus* reduced its speed and speed ratio in contexts where *C. elegans* was  
347 conditioned to mostly avoid the bacterial patch and pose little competitive threat (Figure S5).  
348 While both larva-targeted and adult-targeted biting incentives were relatively high for the tested  
349 scarce bacterial patch, patrolling only increased with adult cohabitants, indicating that increased  
350 speed is not associated with biting in general. Thus, territorial but not predatory biting motivation  
351 increases patrolling speed, reflecting an active and energy-intensive search tactic that is  
352 commensurate with protecting an energy-rich bacterial food supply.

353 We next asked if *P. pacificus* could engage alternate energy-efficient search tactics for  
354 increasing encounters with larval prey. *P. pacificus* must cease feeding on the current prey to  
355 resume search for other prey, so we reasoned that one way to increase prey encounter frequency  
356 without increasing search cost is to reduce prey-feeding time (Figure 5G). Prey are mobile, so  
357 while *P. pacificus* feeds on one prey, other prey could be dispersing, especially when bacterial  
358 abundance is not high enough to retain prey on the patch. To limit dispersal, *P. pacificus* can kill  
359 prey to immobilize it now and then finish eating later. To test this prediction, we measured the  
360 time *P. pacificus* spent feeding on larval prey (~100 in each arena) across various types of  
361 bacterial patches. Importantly, larvae were able to escape the arena, making dispersal a real  
362 threat of food loss. As expected, we found that prey-feeding time per bite was lower when  
363 bacteria were absent or low-density, and higher when bacteria were medium- or high-density

364 (Figure 5H). If prey-feeding time were closely associated with biting in general rather than with  
365 predatory strategy, then we would expect prey-feeding times that were graded with biting  
366 incentive. However, we did not see any difference between prey-feedings times on and off a low-  
367 density patch ( $p = 0.90558$ ), or between a medium- and high-density 1 mm diameter patch ( $p =$   
368  $0.99965$ ) (Figure 5H), where we observed significant differences in biting incentive (Figure 3E).  
369 Instead, feeding times matched *P. pacificus*'s own patch-leaving behavior (Figure S1A), which  
370 may serve as a heuristic for judging other nematodes' patch-leaving proclivity. Furthermore, we  
371 found that bacteria-free and low-density bacterial conditions associated with low prey-feeding  
372 times were also associated with more frequent encounters with prey, even though larvae were  
373 more dispersed (Figure 5I). Therefore, predatory motivation modulates prey-feeding time to  
374 implement a passive search tactic that is appropriate for the lower energy content of prey food.  
375 Overall, by using its biting motivation to coordinate search tactics, *P. pacificus* ensures that  
376 efforts are unified into a cohesive predatory or territorial foraging strategy.

377

### 378 **Blocking dopamine D2 or octopamine receptors modulates territoriality**

379 We explored potential signaling mechanisms for regulating both the biting and search  
380 components of the territorial foraging strategy. Since knowledge of *P. pacificus* pathways is  
381 limited, we consulted known pathways in its well-researched relative, *C. elegans*. In *C. elegans*,  
382 the absence of bacteria attenuates D2-like receptor signaling (the biological action of  
383 amisulpride), which in turn triggers release of octopamine<sup>37</sup>, the invertebrate homolog of  
384 norepinephrine. We hypothesized that a similar pathway used for detecting bacterial scarcity  
385 may also exist in *P. pacificus* for modulating territorial behavior. Using a pharmacological  
386 approach, we exogenously treated *P. pacificus* with various compounds by dispensing a small  
387 volume of a concentrated drug solution onto a small bacterial patch (see Methods: Drug  
388 treatment), and then allowing *P. pacificus* to reside in that patch for two hours immediately  
389 before testing behavior. We found that treatment with dopamine D2 receptor antagonist,  
390 amisulpride, enhanced biting incentive when bacteria were scarce, but had no effect when  
391 bacteria were absent or plentiful (Figure 6A). This suggests that blocking D2 receptors does not  
392 affect general arousal to bite, but is context specific to conditions that signal competitive  
393 pressure. In contrast, treatment with epinastine, a high-affinity octopamine receptor antagonist<sup>38</sup>,  
394 affect biting incentive on all bacterial conditions tested (Figure 6B). Epinastine treatment

395 affected biting incentive in opposite ways, depending on whether bacteria were absent or present.  
396 Specifically, epinastine treatment increased biting incentive when bacteria were absent and  
397 decreased it when bacteria were scarce or plentiful (Figure 6B). The overall result of epinastine  
398 treatment is that biting incentive monotonically decreased with bacterial abundance (Figure 6B),  
399 which is indicative of *P. pacificus* prioritizing predatory outcomes of biting (see Figure 3D).  
400 Moreover, epinastine treatment suppressed the increased patrolling associated with territorial  
401 biting (Figures 6C and 6D), suggesting that epinastine also affects territorial search tactics.  
402 While treatment with specific receptor antagonists affected territorial behavior, we did not see  
403 any change with treatment with a D2 receptor agonist or octopamine (Figure S6). Collectively,  
404 we found that blocking dopamine D2 receptors enhanced territorial biting, while blocking  
405 octopamine receptors induced *P. pacificus* to switch from a territorial to a predatory foraging  
406 strategy for biting adult *C. elegans*.

407

## 408 **Discussion**

409 We present a model of two distinct, flexible, and coordinated foraging strategies that *P. pacificus*  
410 uses for biting its competing prey, *C. elegans* (Figures 6E). *P. pacificus* engages the predatory  
411 foraging strategy (Figure 6E) against larval *C. elegans*, which is easy to kill and poses minimal  
412 competitive threat to the bacterial supply. Here, the goal of biting is to kill and eat prey, so *P.*  
413 *pacificus* bites most when prey is the only food source, and bites less as bacteria becomes more  
414 abundant. While most bites consummate in feeding on larval prey, *P. pacificus* can cut prey-  
415 feeding short and instead use that time to passively search for and immobilize larvae before they  
416 disperse. In contrast to the predatory strategy, the territorial strategy (Figure 6E) is activated  
417 against adult *C. elegans*, which is difficult to kill and consumes bacteria faster than *P. pacificus*.  
418 Instead of biting to acquire prey, here biting is used to protect valuable bacterial food.  
419 Accordingly, *P. pacificus* bites most when bacteria are scarce but abundant enough to defend,  
420 and bites least when bacteria are in negligible or plentiful amounts. These nonfatal bites are  
421 effective in expelling adult *C. elegans* from a bacterial territory, and can eventually induce  
422 conditioned avoidance. Instead of the passive search used in the predatory strategy, *P. pacificus*  
423 actively searches for intruders by increasing its speed to patrol the boundary of the lawn and  
424 stave off rapid depletion of bacteria. Altogether, we illustrate how *P. pacificus* weighs the costs  
425 and benefits of pursuing alternate outcomes of biting *C. elegans*, flexibly reprograms the

426 objective of its biting to prioritize acquisition of either prey or bacterial food, and orchestrates  
427 complete foraging strategies that are energetically commensurate with the value of the food  
428 choice.

429         Consideration of *C. elegans* mobility was key for predicting differences in predatory and  
430 territorial responses, which echoes previous reports that foraging theory often failed to predict  
431 behavior when prey mobility was not sufficiently accounted for<sup>6</sup>. For example, while *C. elegans*  
432 escape from a bite is considered a failure by predatory standards, it can be leveraged for  
433 territorial benefit if escape is directed away from a bacterial patch. This territorial benefit is  
434 amplified when *C. elegans* becomes conditioned to avoid the bacterial patch, similar to how prey  
435 dwell in refuges that have less food but minimize predator danger<sup>39</sup>. We also highlight the  
436 importance of prey mobility for interpreting prey-feeding in intraguild predation. Feeding on  
437 prey is typically associated with predatory motivation, and previous studies measured uneaten  
438 killed prey to implicate potentially competitive motivation for killing competing prey<sup>11</sup>. Similar  
439 suggestions of competitive motivation were recently made about *P. pacificus* surplus-killing of  
440 *C. elegans* larvae in the absence of bacteria<sup>20,40</sup>. However, we found that the contexts with the  
441 highest predatory incentive were associated with reduced prey-feeding time, which runs contrary  
442 to classic foraging models that predict lower prey utilization when prey densities are high<sup>41</sup>. Our  
443 finding is reasonable once we consider that 1) searching for future prey is sequentially dependent  
444 on termination of current prey-feeding, 2) prey disperse when bacterial abundance is low, and 3)  
445 killed prey are immobile and can be cached for later consumption. While predatory attack is  
446 typically associated with immediate food rewards and territorial attack with delayed food  
447 rewards, here we show that *P. pacificus* is concerned with securing a future supply of food in  
448 both predatory and territorial foraging strategies.

449         Our study demonstrates that a nematode with approximately 300 neurons<sup>42</sup> can solve  
450 complex foraging problems in which the pertinent elements have multiple potential roles: *C.*  
451 *elegans* as prey and competitor, bacteria as a food source for *P. pacificus* and habitat for *C.*  
452 *elegans*, and bites with predatory and territorial outcomes. Our deconstruction of the interactions  
453 between *P. pacificus*, *C. elegans*, and bacteria allowed us to disentangle these dualities, with  
454 some limitations. While our models were able to predict general trends of how biting value  
455 should adjust to *C. elegans* target and bacterial abundance, we did not observe full suppression  
456 of biting probability when biting value was predicted to be lowest. It is possible that *P. pacificus*

457 sometimes bites to reaffirm or revise beliefs about biting outcomes, rather than to achieve a  
458 particular outcome. Another possibility is that *P. pacificus* biting behavior is stochastic, although  
459 deterministic behaviors can appear stochastic when some behavioral variables are missing from  
460 consideration<sup>43</sup>. In addition to characterizing behavioral decision-making in *P. pacificus*, we also  
461 conducted initial investigations into the sensory and signaling mechanisms underlying biting  
462 motivation. We identified several sensory neurons that are involved in territorial modulation of  
463 biting, and we proposed potential oxygen-mediated sensation of bacteria based on what is known  
464 in *C. elegans*<sup>30,31</sup>, but future work needs to be done to confirm this in *P. pacificus*. Additionally,  
465 it remains uncertain whether or how *P. pacificus* distinguishes between larval and adult *C.*  
466 *elegans*, although small peptide-mediated recognition of self and non-self may be involved<sup>40</sup>.  
467 Finally, we encourage future work to explore the involvement of dopamine D2 receptor- and  
468 octopamine receptor-mediated signaling in the decision-making process to regulate territorial and  
469 predatory motivations for biting.

470 Our laboratory investigation of the motivations that drive a predator to attack a  
471 competing prey contribute to a multiscale understanding of an ecologically critical phenomenon,  
472 intraguild predation<sup>10</sup>. While intraguild predation is often considered as the killing and  
473 sometimes eating of competing prey, we describe a more versatile variant of intraguild predation  
474 that can achieve competitive benefits without needing to kill. Compared to previous observations  
475 that intraguild predators often selectively kill younger stages of the prey species while leaving  
476 adults to compete freely for resources<sup>10,44</sup>, our study shows that *P. pacificus* can redirect the use  
477 of nonfatal biting away from futile predation and towards effective deterrence of competitors.  
478 The deterrent benefits of nonfatal attacks are consistent with studies of population dynamics that  
479 observe fear-driven avoidance of predator niches after a predator population is introduced to  
480 competing prey populations<sup>9,45</sup>. Here, our work presents a complementary perspective of how  
481 predators consider this avoidance behavior in planning its attacks against competing prey. Taken  
482 together, our use of neuroeconomics, foraging theory, and fine-grained manipulations of foraging  
483 contexts illustrate that multiple motivational states can produce similar attack proclivities, and  
484 that a careful accounting of context is required to attribute particular motivational states to  
485 observed behavior. Furthermore, our study supports a resurgent effort to reaffirm behavioral  
486 interrogation as being equally or more useful than neuroscientific methods for understanding



487 cognitive processes<sup>46</sup>, with emphasis on understanding how an animal's responses are relevant to  
488 its natural life<sup>47</sup>.

## 489 **Methods**

### 490 Animals

491 *P. pacificus* and *C. elegans* were grown on *E. coli* OP50 bacteria and maintained under standard  
492 conditions at 20°C<sup>48,49</sup>. For the main figures, the *P. pacificus* wild isolate RS5194<sup>50,51</sup> and the  
493 standard *C. elegans* N2 strain<sup>49</sup> were used. Other *P. pacificus* wild isolates, PS312<sup>48</sup> and  
494 RS5275<sup>50,51</sup>, were tested during the process of selecting the strain that was most effective at  
495 harming *C. elegans*. used includes. For simplicity, we use ‘adult’ to refer to the young adult (day  
496 1) stage of both nematode species, and ‘larval’ to refer to the L1 stage of *C. elegans*. All *P.*  
497 *pacificus* animals used for behavior were confirmed to have the dual-toothed eurystomatous  
498 mouth form (Figures S1A and S1B), which more efficiently kills larval *C. elegans* compared to  
499 single-toothed stenostomatous individuals<sup>20</sup>.

### 500 Behavioral recordings

501 Behavioral video recordings were acquired using an optiMOS sCMOS camera (QImaging) and  
502 Streampix software. Copper corral arenas were used to keep animals within the field-of-view.

### 503 Bacterial patches

504 Stock liquid cultures of *E. coli* OP50 were prepared by inoculating LB broth, adjusting  
505 concentration to OD<sub>600</sub> = 0.4, and then storing at 4°C. To produce working liquid cultures the  
506 stock culture was either diluted with LB broth, or concentrated by centrifugation (1 ml at 845 rcf  
507 for 5 min) and the removal of supernatant. ‘Low’, ‘medium’, and ‘high’ density patches were  
508 seeded used working liquid culture concentrations of OD<sub>600</sub> = {0.01, 0.30, and 1.00},  
509 respectively (Figures S1H to S1J). Various volumes of liquid culture were pipetted onto 3% agar  
510 NGM plates<sup>52</sup> to produce 1 mm (Figures S1H to S1J), 2 mm (Figure S1K), and 3 mm (Figure  
511 S1L) diameter patches, and then grown for 20 hours at 20°C. The total number of bacteria  
512 pipetted for a high-density, 1 mm patch was less than for a medium-density, 2 mm patch. Fully  
513 grown patches were stored at 4°C and then allowed to come to room temperature for 1 hour  
514 before use.

### 515 Identification of bites

516 The criteria for identifying bites depended on the level of attachment of the *P. pacificus* teeth  
517 onto the *C. elegans* body. Poorly attached bites were identified by the coincidence of: 1)

518 concurrent *P. pacificus* head shortening and stiffening associated with biting (Figures 1D, 1F,  
519 and 1G), and 2) *C. elegans* escape response typical of receiving a hard touch<sup>53</sup>. Strongly attached  
520 bites were identified by disrupted normal locomotion in either nematode caused by the *P.*  
521 *pacificus* mouth being fastened to the *C. elegans* body. This manifested as *C. elegans* thrashing  
522 in place while anchored by a *P. pacificus* bite, or dragging of the *P. pacificus* mouth as an adult  
523 *C. elegans* attempts to escape from the bite (Videos S1 and S2). Kills were indicated by a  
524 breached cuticle and visible leaking of pseudocoelomic fluid (Figure 1E), ultimately leading to  
525 an unresponsive corpse.

#### 526 Fatality and outcomes of biting

527 Short-term killing ability was assayed using a modified version of the biting assay described by  
528 Wilecki and colleagues<sup>20</sup>. A single adult *P. pacificus* was placed in a copper-corralled arena (3.2  
529 mm in diameter) with either 8 adult *C. elegans* or ~100 larval *C. elegans*. Biting behavior was  
530 recorded for 30 minutes and subsequently scored for bites and kills. Biting outcomes were  
531 observed using a similar behavioral setup, but we also tested multiple types of bacterial patches.

532 Long-term killing ability success was assayed by placing a single adult *P. pacificus* with  
533 a single adult *C. elegans* for 24 hours in a copper-corralled arena 3.2 mm in diameter. The  
534 presence of a killed adult *C. elegans* was checked at 1, 4, 8, and 24 hours.

#### 535 Patch avoidance

536 To provide ample space for avoiding a bacterial patch, we used a larger arena (9.5 mm in  
537 diameter) with a 2 mm patch (medium density) in the center. A single adult *C. elegans* and 3  
538 adult *P. pacificus* were placed into the arena and recorded for 30 minutes at 0 and again at 6  
539 hours (same animals). The time that *C. elegans* spent fully inside the patch, with only its head in  
540 the patch, and fully outside the patch were recorded.

#### 541 Egg distribution

542 The egg distribution assay used the same behavioral setup as the patch avoidance assay. A  
543 variable 4-nematode mixture of adult *P. pacificus* and/or adult *C. elegans* were placed into the  
544 arena and removed 7 hours later. A *C. elegans* strain with integrated GFP reporter that expresses  
545 in eggs (CX7389: *kyIs392 [Pstr-2::GFP::rab-3; Ptxx-3::lin-10::dsRed; Pelt-2::GFP]*) was used  
546 to visually distinguish *C. elegans* eggs from non-fluorescent *P. pacificus* eggs. Egg plates were  
547 incubated at RT for one hour and then at 4°C for 2 days to allow GFP expression to increase

548 while preventing hatching. Arenas were then imaged under bright-field and fluorescence  
549 microscopy using a Zeiss Axio Zoom.V16 microscope. The distances of eggs from the center of  
550 the patch were measured using MATLAB.

#### 551 Patch-finding

552 The patch-finding assay used the same behavioral setup as the patch avoidance and egg  
553 distribution assay. Mature CX7389 (*Pelt-2::GFP*) eggs were transferred from a bacteria-depleted  
554 plate to one side of a clean 3% agar NGM plate. Ten newly hatched L1 larvae found on the  
555 opposite side of the plate were transferred to a specific radius from the center of the patch.  
556 Cylindrical plugs excised from a clean 3% agar plate were used to gently transfer larvae. After  
557 transfer, larval health was assessed by checking for normal, vigorous locomotion. Plates were  
558 checked on a Zeiss Axio Zoom.V16 microscope 36 hours later for the presence of fluorescent  
559 larvae inside the patch.

#### 560 Oil Red O staining

561 The caloric values of various diets were assessed by feeding ~300 adult *P. pacificus* diets  
562 comprised of excess *E. coli* OP50, adult *C. elegans*, or larval *C. elegans* for 6 hours. As a  
563 control, *P. pacificus* was food-deprived for 6 hours. Oil Red O (ORO) lipid staining<sup>54</sup> was  
564 carried out as described by Escorcía and colleagues<sup>55</sup>. Stained *P. pacificus* animals were imaged  
565 on a Zeiss Axio Imager M2 microscope with a Hamamatsu color CCD camera. Color  
566 deconvolution<sup>56</sup> was done in ImageJ to separate ORO, background, and unstained body colors.  
567 ORO pixels were quantified as a percentage of worm body area.

#### 568 Food switching

569 The food switching assay was adapted from the leaving assay described by Shtonda and  
570 colleagues<sup>23</sup>. Pairs of different food patches were placed 2 mm apart on a 35 mm NGM plate. *E.*  
571 *coli* OP50 spots were made by seeding 0.3 µl of liquid culture ( $OD_{600} = 0.4$ ) and grown for 2  
572 days. To produce *C. elegans* food patches, we used strains with locomotion phenotypes in order  
573 to restrict movement without use of anesthetics, which would also affect *P. pacificus* and prevent  
574 free movement between food spots. Adult *C. elegans* spots consisted of ~20 animals with roller  
575 locomotion phenotype (IV95: *ueEx46* [*gcy-7-sl2-mCherry*; *Punc-122::RFP*]; *gvIs246* [*ida-*  
576 *1::GFP+ pRF4 rol-6(su1006)*]). Larval *C. elegans* spots consisted of ~500 animals with kinky  
577 locomotion phenotype (CB81: *unc-18(e81) X*). *unc-18* mutant adults were not used because they

578 moved considerable when bacteria were absent, even though they barely moved when they were  
579 on bacteria. Food preference was assayed by placing a single adult *P. pacificus* in one food patch  
580 and checking 1 hour later to see if it had switched to the nearby alternate food spot. Switching  
581 probability was calculated as the number of *P. pacificus* that switched divided by the total  
582 number of *P. pacificus* animals. Food preference was determined by using the transitive property  
583 of inequalities: if  $p(a \rightarrow b) < p(c \rightarrow b)$ , then *P. pacificus* prefers food *a* over food *c*.

#### 584 Bacteria consumption and progeny proliferation

585 Initial bacterial supply was created by seeding 0.3  $\mu$ l of OP50-GFP liquid culture ( $OD_{600} = 0.7$ )  
586 on 3% agar NGM 35 mm plates (with peptone omitted to minimize bacterial growth). Patches  
587 were allowed to saturate growth for 2 days. Initial bacterial levels were measured by imaging the  
588 OP50-GFP patches under fluorescence with consistent excitation and exposure parameters on a  
589 Zeiss Axio Zoom.V16 microscope and measuring GFP luminance. A single adult *P. pacificus* or  
590 adult *C. elegans* was placed by itself on a patch and imaged at 12 and 24 hours. GFP  
591 fluorescence, number of eggs, and number of hatched larvae were recorded.

#### 592 Expected utility of biting

593 For a well-fed (with bacteria) *P. pacificus* individual presented with a particular *C. elegans* target  
594 and bacterial condition, the overall value of biting was estimated by calculating the expected  
595 utilities<sup>24</sup> of biting outcomes. We calculated the expected utility of each outcome,

$$EU_{i,j} = p_{i,j} \times u_{i,j}$$

596 where  $p_{i,j}$  and  $u_{i,j}$  are the probability and utility (subjective value), respectively, of an  
597 outcome *i* (predatory, territorial) given an individual bite against a target *j* (larval *C. elegans*,  
598 adult *C. elegans*). Predatory outcomes are defined as feeding on the target, whereas territorial  
599 outcomes are defined as removing competitors from the bacterial territory.

600 First, we estimated  $p_{i,j}$  using empirically obtained probabilities. For the probabilities  
601 associated with the predatory and territorial outcomes of a larva-targeted bite,  $p_{P,L}$  and  $p_{P,T}$ , we  
602 used the empirically estimated probability that *P. pacificus* feeds on prey given a larva-targeted  
603 bite (Figure S1M),

$$p_{P,L} = p_{T,L} = 0.8115$$

604 We equated  $p_{P,L}$  to  $p_{T,L}$  since killing and feeding on larvae simultaneously eliminates  
605 competitors. For the probability of a predatory outcome of an-adult targeted bite,  $p_{T,A}$ , we

606 estimated the probability that an adult *C. elegans* exits a bacterial patch given a bite it receives  
607 while inside the patch (Figure S1N).

$$p_{T,A} = 0.6483$$

608 Since the objective probabilities values used for estimating  $p_{P,L}$ ,  $p_{T,L}$ , and  $p_{T,A}$  were similar  
609 across bacterial abundance (Figures S1M and S1N), we assumed that  $p_{P,L}$ ,  $p_{T,L}$ , and  $p_{T,A}$  were  
610 constants and pooled data across bacterial conditions. Finally, for the probability of a predatory  
611 outcome of an-adult targeted bite,  $p_{P,A}$ , we measured the number of bites that a single *P.*  
612 *pacificus* inflicts on a single adult *C. elegans* in a bacteria-free arena (3.2 mm diameter) until it  
613 successfully kills and feeds on the prey (Figure S1F). Since each successive bite may contribute  
614 cumulative harm in a way that kills *C. elegans* by attrition, the bite events are not independent of  
615 each other. Therefore the true  $p_{P,A}$  should be a cumulative probability that is very low during the  
616 first bite and very high at ~25 bites. However, treating bites as cumulative or independent results  
617 in the same long-term incidence of killed prey, so we treated each bite as independent for  
618 simplicity of prediction,

$$p_{P,A} = \frac{1}{24.5} = 0.0408$$

619 Next, we described outcome utility as a function of bacterial abundance,  $u(a)$ . We  
620 divided bacteria abundance into three behaviorally defined subranges: negligible, scarce, and  
621 plentiful. The ‘negligible’ subranges encompassed the physical absence of bacteria, as well as  
622 bacterial abundance levels that are too small for *P. pacificus* to detect or care to exploit. We take  
623 the negligible subrange to be determined by sensory ability and internal state (hunger, satiety),  
624 and therefore consistent across outcome-target pairings when *P. pacificus* animals have been  
625 well-fed on OP50. The ‘scarce’ subrange included the minimum bacterial abundance that *P.*  
626 *pacificus* is willing to exploit, as well as other low levels of bacteria that induce *P. pacificus* to  
627 use biting as a means to secure additional food. Finally, the ‘plentiful’ subrange referred to  
628 excess bacterial abundance levels in which *P. pacificus* does not need to bite and focuses only on  
629 grazing on bacteria. Importantly, the scarce and plentiful subranges may vary depending on the  
630 outcome and target being considered.

631 Based on *P. pacificus*’s preference for bacteria food over prey (Figure 3B), we generally  
632 defined predatory utility functions as having a constant maximal value over the negligible  
633 subrange where prey is the only acceptable food option, then monotonically decreasing over the

634 scarce subrange, until it bottoms out to zero utility over the plentiful range. We reasoned that  
635 predatory utility over the negligible subrange should reflect the relative long-term net energy  
636 gain of eating prey when it is the only food option. Instead of calculating energy intake and  
637 dividing by food handling time, we approximate long-term net energy gain using ORO staining  
638 of fat stores (see Methods: Oil Red O staining), a proxy indicator of excess energy intake (Figure  
639 3A). With excess food and assumed lack of satiety (OP50, the highest quality food, does not  
640 induce satiety<sup>57</sup>, we assumed that *P. pacificus* spent the entire time (6 hours) feeding and  
641 handling food (search time is assumed to be zero). Using the relative ORO-stained area in prey-  
642 fed *P. pacificus* compared to bacteria-fed *P. pacificus* (taken to be 1), we estimate predatory  
643 utility of biting larval and adult targets over the negligible subrange,

$$u_{P,L}(a_{negligible}) = 0.4179$$

$$u_{P,A}(a_{negligible}) = 0.5686$$

644 For predatory utility over the scarce subrange, we use the probability that *P. pacificus* switches  
645 from a prey patch to a bacterial patch (Figure 3B) to linearly approximate how much prey *P.*  
646 *pacificus* foregoes with each increase in bacterial abundance,

$$u_{P,L}(a_{scarce}) = 0.4179 - 0.406a_{scarce}$$

$$u_{P,A}(a_{scarce}) = 0.5686 - 0.641a_{scarce}$$

647 Compared to predatory value functions, we set territorial utility functions to be non-  
648 monotonic to reflect the multi-faceted dependence of bite utility on both bacterial abundance and  
649 on the more abstract property of bacterial territory. We reasoned that territorial utility over the  
650 scarce subrange should be zero, since there is no bacteria territory present or worth defending. At  
651 the transition between negligible and scarce subranges, territorial utility should jump suddenly to  
652 a maximal utility, since this is where scarcity-induced competitive pressure is highest. Like  
653 predatory utility functions, territorial utility should also decrease monotonically over the scarce  
654 subrange. To estimate the maximal territorial utility, we use the bacterial consumption rate of *C.*  
655 *elegans* relative to that of *P. pacificus* (Figure 3C). Adult *C. elegans* consumes bacteria 1.5x  
656 faster than *P. pacificus*, but we found that the addition of L1 larvae (range 20-62) alongside an  
657 adult *C. elegans* did not increase bacterial consumption rate (Figures 3C, S3E, and S3F). This  
658 finding differs considerably from previous reports that L1-L2 stage *C. elegans* consumes ~25%  
659 the rate of an adult *C. elegans*<sup>58</sup>. This discrepancy may be due to that study's use of liquid  
660 bacterial culture rather than a viscous patch, or due to our indirect measure of larval bacterial

661 consumption (we did not measure larvae by themselves). To acquire a conservative estimate of  
662 larval bacterial consumption rate, we set adult *C. elegans* consumption to zero and assumed  
663 staggered hatching of larvae, and obtained a rate that is 1/20<sup>th</sup> the rate of adult *C. elegans*. To  
664 alleviate competitive pressure to defend territory, we reasoned that there should be additional  
665 bacterial allocated for *C. elegans* in addition to the amount that would be considered plentiful  
666 without *C. elegans* competition. To approximate this latter amount, we used the length of the  
667 scarce subrange for  $u_{P,L}$ . Altogether, we defined the territorial value over the scarce subrange for  
668 larval and adult *C. elegans*,

$$u_{T,L}(a_{scarce}) = 1.5 - \left( \frac{1.5}{1.0293(1+1.5)} \right) a_{scarce} = 1.5 - 0.589 a_{scarce}$$

$$u_{T,A}(a_{scarce}) = 0.05 - \left( \frac{0.05}{1.0293(1+0.05)} \right) a_{scarce} = 1.5 - 0.0463 a_{scarce}$$

669 Finally, expected utility was calculated by multiplying the corresponding probability and  
670 utility function for each target-outcome pair, and then comparing within-target to predict which  
671 outcome is more lucrative for a particular *C. elegans* target,

$$EU_{i,j} = p_{i,j} \times u_{i,j}$$

$$EU_{P,L} > EU_{P,A}$$

$$EU_{T,L} < EU_{T,A}$$

672 It is important to note that the purpose of this bite choice model is to predict the shape of  
673 expected utility functions across the behaviorally defined bacterial abundance subranges, rather  
674 than to precisely predict  $p(\text{bite}/\text{encounter})$  values. It is unclear how characteristics of bacterial  
675 patches such as diameter and density would map onto the one-dimensional bacterial abundance  
676 x-axis in the model, so we cannot assign predicted  $p(\text{bite}/\text{encounter})$  values to particular bacterial  
677 patches. Instead, to test the model, we will manipulate either only diameter or density, with one  
678 patch (medium-density, 1 mm diameter) that is common to both sets of tested patches. By  
679 comparing  $p(\text{bite}/\text{encounter})$  across patches, we can see if patch diameter has an additive effect  
680 on top of patch density. Then we will assess monotonicity, which is not affected by the scaling  
681 (of bacterial abundance) between bacterial patches that are ordered from lowest abundance to  
682 highest abundance.

683 Biting incentive



684 Biting incentive was measured using the same behavioral setup for assaying the immediate  
685 consequences of biting (arena 3.2 mm in diameter, 30 minutes, 1 adult *P. pacificus* with ~100  
686 larval *C. elegans* or 1 adult *C. elegans*). Our criteria for determining encounters and bites were  
687 slightly modified from those used by Seroby and colleagues<sup>19</sup> and Wilecki and colleagues<sup>20</sup>.  
688 Bites were scored the same way as for measuring killing ability. Individual encounters were  
689 counted when: 1) the *P. pacificus* mouth fully contacted the *C. elegans* body, and 2) *P. pacificus*  
690 interrupted its normal locomotion by slowing down or contorting its head toward *C. elegans*,  
691 thereby positively indicating detection of *C. elegans*. Biting incentive for each *P. pacificus*  
692 animal was calculated by dividing the number of bites by the number of encounters,  
693  $p(\text{bite}|\text{encounter})$ .

#### 694 Amphid neuron ablation

695 DiO staining of amphid neurons was adapted from published staining of *P. pacificus*<sup>59</sup>. Larval J2  
696 *P. pacificus* were stained for 2 hours on a nutator in a solution of 15 ng/ml Fast DiO  
697 (ThermoFisher D3898) and then de-stained on an empty NGM plate for 1 hour. A 3% agar plug  
698 was used to gently transfer stained J2 animals onto a 2% agarose pad (melted in M9) with 20  
699 mM sodium azide paralytic. Pairs of amphid neurons were ablated using an Andor Micropoint  
700 focused laser microbeam system. Cell identification was based on the identities described by  
701 Hong and colleagues<sup>60</sup>. Cell death was confirmed by identifying a morphological change within  
702 the cell, and by re-staining after behavior was recorded. Each ablated J2 was transferred onto its  
703 own bacterial patch to recover before being used 2 days later to measure biting incentive.

#### 704 Search speed

705 Since the *P. pacificus* mouth is engaged in both feeding on bacteria and biting *C. elegans*, we  
706 tracked mouth location instead of the body's center of mass. Mouth location on a bacterial patch  
707 (medium density, 1 mm in diameter) was manually tracked using MATLAB. To focus on  
708 deliberate on-patch exploration patterns, we restricted analysis to the longest continuous video  
709 segment ( $\geq 10$  minutes of a 30-minute recording) during which *P. pacificus* did not leave the  
710 patch. To measure total movement, we calculated translational speed as the sum of the Euclidean  
711 distances between each recorded mouth location, divided by total time. To measure patrolling  
712 around the circular patch boundary, we first measured the widest arc of the patch circumference  
713 that *P. pacificus* traversed (excluding back-and-forth movements or traveling along a chord to

714 another location on the patch circumference that do not contribute to forward progress) in  
715 between changing directions (clockwise ↔ counterclockwise). Then, we summed all arc lengths  
716 (angle × radius) and divided by total time to arrive at what we call patrol speed. The ratio of  
717 patrol speed to translational speed was used to compare differences in how much movement is  
718 dedicated to patrolling. The speed ratio was also used to discount stationary bouts of feeding on  
719 larval *C. elegans*

## 720 Drug treatment

721 The bacterial patch used for treatment was formed by seeding 0.5 μl of liquid *E. coli* OP50  
722 cultures (OD<sub>600</sub> = 0.4) on a 35 mm NGM plate and growing for 2 days at room temperature. 2 μl  
723 of a working drug solution (5 mM amisulpride, 10 mM sumanirole maleate, 100 mM  
724 octopamine, 100 mM epinastine) was dispensed onto the patch, 1 μl at a time and allowed to dry  
725 in between. As soon as the patch was visibly dry, *P. pacificus* young adults were placed on the  
726 treated patch for 2 hours before use in behavioral assays.

## 727 Statistical Analyses

728 For datasets in which all measurements are independent results, assumptions for statistical tests  
729 were assessed to select an appropriate parametric or non-parametric test for comparing samples.  
730 The Shapiro–Wilk test was used to test for normality within each sample, and the Levene’s test  
731 was used to test for homogeneity of variances across samples. Student’s t-test was used to  
732 compare two normally distributed samples with equal variances, while Welch’s t-test was used to  
733 compare two non-normally distributed samples with unequal variances. Wilcoxon’s rank sum  
734 test was used to compare two non-normally distributed samples with equal variances. Dunn’s test  
735 was used to compare non-normally distributed samples with unequal variances. For paired  
736 comparisons, the paired t-test was used compare samples with normally distributed differences,  
737 while Wilcoxon’s signed rank test was used to compare samples with non-normally distributed  
738 differences. One-or two-way ANOVAs were used to compare three or more normally distributed  
739 groups. For post-hoc tests after an ANOVA, Dunnett’s test was used to conduct simultaneous  
740 multiple comparisons in which samples are compared to a control, and Tukey’s HSD was used to  
741 conduct simultaneous multiples comparisons between all pairs. As a parametric alternative to  
742 ANOVA, the Kruskal-Wallis test was used to compare three or more non-normally distributed  
743 groups, with Dunn’s test as the post-hoc test for simultaneous comparisons of all pairs. To avoid

744 making assumptions of normality in error bar representation, we performed bootstrap resampling  
745 to calculate 95% confidence intervals around the mean.

746 For datasets in which both independent and dependent variables were categorical, we  
747 assembled data into a contingency table and conducted Fisher's exact test.

748 For datasets with multiple measurements per independent result, we built statistical  
749 models to compare estimated means across categories. Binomial logistic regression<sup>61</sup> was used to  
750 model data in which independent results consist of a variable number of trials with two possible  
751 outcomes (Figures 1H, 1J, 1K, 2D, 2F, 3E, 3F, 4C, 6A, 6B, S1D, S6A, S6B). The primary  
752 benefit of binomial logistic regression models is to give more weight to independent results with  
753 more trials. All figures with y-axes starting with "*p(name of event)*" (not including Figure 1I)  
754 feature sample probabilities and confidence intervals predicted by binomial logistic regression  
755 model. Linear mixed-effects (LME) models were used to model hierarchical egg distribution  
756 data (Figure 2C), which has non-independence in the data at one level (egg distances within an  
757 arena) and independence at a higher level (arenas). To model the effect of mix of adult  
758 nematodes on egg distances (Figure 2C), separate models were fitted for each egg species to  
759 model. Convergence of LME models was assessed by fitting models with all available optimizers  
760 and checking that all optimizers converge to values that are practically equivalent. For all  
761 binomial logistic regression models and LME models, likelihood ratio tests were used to assess  
762 goodness of fit by comparing full models to null models (Table S1). To compare between  
763 multiple levels of a category, Wald tests with single-step p-value adjustment were used to test  
764 linear hypotheses and limit issues related to multiple comparisons.

765 Benjamini-Hochberg correction was used to adjust p-value for all comparisons involving  
766 multiple independent tests.

767 To measure associations between variables, we used different coefficients or  
768 combinations of coefficients, depending on the type of association we wanted to describe. To  
769 measure linear correlation between two variables, we used Pearson's  $r$ . To measure how well a  
770 monotonic function describes the relationship between two variables, we used Spearman's  $\rho$ . To  
771 measure the non-linear and non-monotonic relationship between two variables, we first checked  
772 for a very low value for Spearman's  $\rho$  (indicative of non-monotonicity), and then used Hoeffding's  
773 D.

774 All statistical analyses were carried out with the R statistical software<sup>62</sup>. The additional  
775 package lme4<sup>63</sup> was used to conduct linear mixed-effects models, and the additional package  
776 multcomp<sup>64</sup> to conduct linear hypotheses with single-step adjustment for multiple comparisons.

## 777 **Supplemental Video Titles and Legends**

### 778 **Supplemental Video S1. *P. pacificus* easily kills larval *C. elegans*.**

779 *P. pacificus* bites, kills, and feeds on a *C. elegans* larva (L1 stage).

### 780 **Supplemental Video S2. Adult *C. elegans* escapes *P. pacificus* after being bit.**

781 *P. pacificus* (initially horizontal) bites a young adult *C. elegans* (initially vertical) in the absence  
782 of bacteria, followed by *C. elegans* escaping from the bite.

### 783 **Supplemental Video S3. Adult *C. elegans* exits bacterial patch after being bitten.**

784 *C. elegans* (initially on left) retreats from a *P. pacificus* (initially on right) bite and subsequently  
785 exits a bacterial patch.

### 786 **Supplemental Video S4. *P. pacificus* decides to exploit low-density bacterial patch.**

787 *P. pacificus* (initially on left) decides to stay on a 1 mm, low-density bacteria patch and bites  
788 adult *C. elegans* (initially on top). Adult *C. elegans* exits the patch after being bitten.

### 789 **Supplemental Video S5. *P. pacificus* decides to not exploit low-density bacterial patch.**

790 *P. pacificus* (initially on bottom right) encounters and decides to leave a 1 mm, low-density  
791 bacteria patch.

### 792 **Supplemental Video S6. *P. pacificus* patrols the boundary of a bacterial patch.**

793 *P. pacificus* (initially outside of patch) enters and patrols the border of a bacterial patch, then  
794 bites adult *C. elegans* (initially inside of patch).

795 **References**

- 796 1. Richmond, C. E., Breitburg, D. L., and Rose, K. A. (2005). The role of environmental  
797 generalist species in ecosystem function. *Ecological modelling* 188, 279-295.  
798 10.1016/j.ecolmodel.2005.03.002.
- 799 2. Clavel, J., Julliard, R., and Devictor, V. (2011). Worldwide decline of specialist species:  
800 toward a global functional homogenization?. *Front. Ecol. Environ.* 9, 222-228.  
801 10.1890/080216.
- 802 3. Stephens, D. W. and Krebs, J. R. (1986). *Foraging Theory* (Princeton Univ. Press).
- 803 4. Waddington, K. D., and Holden, L. R. (1979). Optimal foraging: on flower selection by  
804 bees. *Am. Nat.* 114, 179-196. 10.1086/283467.
- 805 5. Stephens, D. W., Lynch, J. F., Sorensen, A. E., and Gordon, C. (1986). Preference and  
806 profitability: theory and experiment. *Am. Nat.* 127, 533-553. 10.1086/284501.
- 807 6. Sih, A., and Christensen, B. (2001). Optimal diet theory: when does it work, and when and  
808 why does it fail?. *Animal behaviour* 61, 379-390. 10.1006/anbe.2000.1592.
- 809 7. Arim, M., and Marquet, P. A. (2004). Intraguild predation: a widespread interaction related  
810 to species biology. *Ecol. Lett.* 7, 557-564. 10.1111/j.1461-0248.2004.00613.x.
- 811 8. Holt, R. D., and Polis, G. A. (1997). A theoretical framework for intraguild predation. *The*  
812 *Am. Nat.* 149, 745-764. 10.1086/286018.
- 813 9. Pringle, R.M., Kartzinel, T.R., Palmer, T.M., Thurman, T.J., Fox-Dobbs, K., Xu, C.C.,  
814 Hutchinson, M.C., Coverdale, T.C., Daskin, J.H., Evangelista, D.A. et al. (2019). Predator-  
815 induced collapse of niche structure and species coexistence. *Nature* 570, 58-64.  
816 10.1038/s41586-019-1264-6.
- 817 10. Polis, G. A., Myers, C. A., and Holt, R. D. (1989). The ecology and evolution of intraguild  
818 predation: potential competitors that eat each other. *Annu. Rev. Ecol. Syst.* 20, 297-330.  
819 10.1146/annurev.es.20.110189.001501.
- 820 11. Sunde, P., Overskaug, K., and Kvam, T. (1999). Intraguild predation of lynxes on foxes:  
821 evidence of interference competition?. *Ecography* 22, 521-523. 10.1111/j.1600-  
822 0587.1999.tb01281.x.
- 823 12. Desisto, M. J., and Huston, J. P. (1970). Effect of territory on frog-killing by rats. *The*  
824 *Journal of general psychology* 83, 179-184.

- 825 13. Bandler Jr, R. J. (1970). Cholinergic synapses in the lateral hypothalamus for the control of  
826 predatory aggression in the rat. *Brain Research* 20, 409-424. 10.1016/0006-8993(70)90171-  
827 X.
- 828 14. Kemble, E. D., Flannelly, K. J., Salley, H., and Blanchard, R. J. (1985). Mouse killing, insect  
829 predation, and conspecific attack by rats with differing prior aggressive experience.  
830 *Physiology & behavior*. 34, 645-648. 10.1016/0031-9384(85)90063-0.
- 831 15. Bridgman, L. J., Innes, J., Gillies, C., Fitzgerald, N. B., Miller, S., and King, C. M. (2013)  
832 Do ship rats display predatory behaviour towards house mice?. *Animal Behaviour* 86, 257-  
833 268. 10.1016/j.anbehav.2013.05.013.
- 834 16. Kruuk, H. (1972). Surplus killing by carnivores. *Journal of Zoology* 166, 233-244.  
835 10.1111/j.1469-7998.1972.tb04087.x
- 836 17. Adams, E. S., and Mesterton-Gibbons, M. (1995). The cost of threat displays and the stability  
837 of deceptive communication. *Journal of Theoretical Biology* 175, 405-421.  
838 10.1006/jtbi.1995.0151.
- 839 18. Quach, K. T. and Chalasani, S. H. (2020). Intraguild predation between *Pristionchus*  
840 *pacificus* and *Caenorhabditis elegans*: a complex interaction with the potential for aggressive  
841 behaviour. *J. Neurogenetics* 34, 404-419. 10.1080/01677063.2020.1833004.
- 842 19. Serobyanyan, V., Ragsdale, E. J. and Sommer, R. J. (2014). Adaptive value of a predatory  
843 mouth-form in a dimorphic nematode. *Proc. R. Soc. B*. 281, 20141334.  
844 10.1098/rspb.2014.1334.
- 845 20. Wilecki, M., Lightfoot, J. W., Susoy, V. and Sommer, R. J. (2015). Predatory feeding  
846 behaviour in *Pristionchus* nematodes is dependent on phenotypic plasticity and induced by  
847 serotonin. *J. Exp. Biol.* 218, 1306–1313. 10.1242/jeb.118620.
- 848 21. Cassada, R. C. and Russell, R. L. (1975). The dauer larva, a post-embryonic developmental  
849 variant of the nematode *Caenorhabditis elegans*. *Dev. Biol.* 46, 326–342. 10.1016/0012-  
850 1606(75)90109-8.
- 851 22. Frederick, S., Loewenstein, G. and O'Donoghue, T. (2002). Time discounting and time  
852 preference: a critical review. *J. Econ. Lit.* 40, 351–401. 10.1257/002205102320161311.
- 853 23. Shtonda, B. B. and Avery, L. (2006). Dietary choice behavior in *Caenorhabditis elegans*. *J.*  
854 *Exp. Biol.* 209, 89–102. doi.org/10.1242/jeb.01955.

- 855 24. Bernoulli, D. (1738). Specimen theoriae novae de mensura sortis. Commentarii Academiae  
856 Scientiarum Imperialis Petropolitanae 5, 175–192.
- 857 25. Carpenter, F. L. and MacMillen, R. E. (1976). Threshold model of feeding territoriality and  
858 test with a Hawaiian honeycreeper. *Science* 194, 639–642. 10.1126/science.194.4265.639.
- 859 26. Briggman, K.L., Abarbanel, H.D. and Kristan, W.B. Jr. (2005). Optical imaging of neuronal  
860 populations during decision-making. *Science* 307, 896–901. 10.1126/science.1103736.
- 861 27. Gray, J. M., Hill, J. J. and Bargmann, C. I. (2005). A circuit for navigation in *Caenorhabditis*  
862 *elegans*. *Proc. Natl Acad. Sci. USA*. 102, 3184–3191. 10.1073/pnas.0409009101.
- 863 28. Hong, R. L., and Sommer, R. J. (2006). Chemoattraction in *Pristionchus* nematodes and  
864 implications for insect recognition. *Curr. Biol.* 16, 2359–2365. 10.1016/j.cub.2006.10.031.
- 865 29. Bargmann, C. I., Hartweg, E. and Horvitz, H. R. (1993). Odorant-selective genes and  
866 neurons mediate olfaction in *C. elegans*. *Cell* 74, 515–527. 10.1016/0092-8674(93)80053-H.
- 867 30. Rogers, C., Persson, A., Cheung, B. and de Bono, M. (2006). Behavioral motifs and neural  
868 pathways coordinating O<sub>2</sub> responses and aggregation in *C. elegans*. *Curr. Biol.* 16, 649–659.  
869 10.1016/j.cub.2006.03.023.
- 870 31. de Bono, M. and Bargmann, C. I. (1998). Natural variation in a neuropeptide Y receptor  
871 homolog modifies social behavior and food response in *C. elegans*. *Cell* 94, 679–689.  
872 10.1016/S0092-8674(00)81609-8.
- 873 32. Moreno, E., McGaughan, A., Rödelsperger, C., Zimmer, M. and Sommer, R. J. (2016).  
874 Oxygen-induced social behaviours in *Pristionchus pacificus* have a distinct evolutionary  
875 history and genetic regulation from *Caenorhabditis elegans*. *Proc. R. Soc. B.* 283, 20152263.  
876 10.1098/rspb.2015.2263.
- 877 33. Moreno, E., Sieriebriennikov, B., Witte, H., Rödelsperger, C., Lightfoot, J.W. and Sommer,  
878 R.J. (2017). Regulation of hyperoxia-induced social behaviour in *Pristionchus pacificus*  
879 nematodes requires a novel cilia-mediated environmental input. *Sci. Rep.* 7, 17550.  
880 10.1038/s41598-017-18019-0.
- 881 34. Moreno, E., Lenuzzi, M., Rödelsperger, C., Prabh, N., Witte, H., Roeseler, W., Riebesell, M.  
882 and Sommer, R.J. (2018). DAF-19/RFX controls ciliogenesis and influences oxygen-induced  
883 social behaviors in *Pristionchus pacificus*. *Evol. Dev.* 20, 233–243.  
884 doi.org/10.1111/ede.12271.

- 885 35. Sawin, E. R., Ranganathan, R. and Horvitz, H. R. (2000). *C. elegans* locomotory rate is  
886 modulated by the environment through a dopaminergic pathway and by experience through a  
887 serotonergic pathway. *Neuron* 26, 619–631. 10.1016/S0896-6273(00)81199-X.
- 888 36. Gray, J.M., Karow, D.S., Lu, H., Chang, A.J., Chang, J.S., Ellis, R.E., Marletta, M.A. and  
889 Bargmann, C.I. (2004). Oxygen sensation and social feeding mediated by a *C. elegans*  
890 guanylate cyclase homologue. *Nature* 430, 317–322. 10.1038/nature02714.
- 891 37. Suo, S., Culotti, J.G. and Van Tol, H.H. (2009). Dopamine counteracts octopamine signalling  
892 in a neural circuit mediating food response in *C. elegans*. *EMBO J.* 28, 2437–2448.  
893 10.1038/emboj.2009.194.
- 894 38. Roeder, T., Degen, J. and Gewecke, M. (1998). Epinastine, a highly specific antagonist of  
895 insect neuronal octopamine receptors. *Eur. J. Pharmacol.* 349, 171–177. 10.1016/S0014-  
896 2999(98)00192-7.
- 897 39. Sih, A. (1987). Prey refuges and predator-prey stability. *Theoretical Population Biology* 31,  
898 1-12. 10.1016/0040-5809(87)90019-0.
- 899 40. Lightfoot, J.W., Wilecki, M., Rödelsperger, C., Moreno, E., Susoy, V., Witte, H. and  
900 Sommer, R.J. (2019). Small peptide-mediated self-recognition prevents cannibalism in  
901 predatory nematodes. *Science* 364, 86–89. 10.1126/science.aav9856.
- 902 41. Sih, A. (1980). Optimal foraging: partial consumption of prey. *Am. Nat.* 116, 281-290.  
903 10.1086/283626.
- 904 42. Sommer, R. J., ed. (2015). *Pristionchus pacificus*: a nematode model for comparative and  
905 evolutionary biology (Brill).
- 906 43. Stephens, G.J., Johnson-Kerner, B., Bialek, W. and Ryu, W.S. (2008). Dimensionality and  
907 dynamics in the behavior of *C. elegans*. *PLoS Comput. Biol.* 4, e1000028.  
908 10.1371/journal.pcbi.1000028.
- 909 44. Wissinger, S. A. (1992). Niche overlap and the potential for competition and intraguild  
910 predation between size-structured populations. *Ecology* 73, 1431-1444. 10.2307/1940688.
- 911 45. Sommers, P. and Chesson, P. (2019). Effects of predator avoidance behavior on the  
912 coexistence of competing prey. *Am. Nat.* 193, E132–E148. 10.1086/701780.
- 913 46. Y. Niv. (2020). The primacy of behavioral research for understanding the brain. *PsyArXiv*,  
914 10.31234/osf.io/y8mxe.



- 915 47. J. W. Krakauer, A. A. Ghazanfar, A. Gomez-Marin, M. A. MacIver, and D. Poeppel. (2017).  
916 Neuroscience needs behavior: correcting a reductionist bias. *Neuron* 93, 480-490.  
917 10.1016/j.neuron.2016.12.041.
- 918 48. Sommer, R. J., Carta, L. K., Kim, S.-Y. and Sternberg, P. W. (1996). Morphological, genetic  
919 and molecular description of *Pristionchus pacificus* sp. n. (Nematoda: Neodiplogastridae).  
920 *Fundam. Appl. Nematol.* 19, 511–521.
- 921 49. Brenner, S. (1974). The genetics of *Caenorhabditis elegans*. *Genetics* 77, 71–94.
- 922 50. Click, A., Savaliya, C. H., Kienle, S., Herrmann, M. and Pires-daSilva, A. (2009). Natural  
923 variation of outcrossing in the hermaphroditic nematode *Pristionchus pacificus*. *BMC Evol.*  
924 *Biol.* 9, 75. 10.1186/1471-2148-9-75.
- 925 51. Herrmann, M., Kienle, S., Rochat, J., Mayer, W. E. and Sommer, R. J. (2010). Haplotype  
926 diversity of the nematode *Pristionchus pacificus* on Réunion in the Indian Ocean suggests  
927 multiple independent invasions. *Biol. J. Linnean Soc.* 100, 170-179. 10.1111/j.1095-  
928 8312.2010.01410.x.
- 929 52. Stiernagle, T. (1999) Maintenance of *C. elegans*. In *C. elegans*, I. A. Hope, ed. (Oxford  
930 University Press), pp. 51-67.
- 931 53. Pirri, J. K. and Alkema, M. J. (2012). The neuroethology of *C. elegans* escape. *Curr. Opin.*  
932 *Neurobiol.* 22, 187–93. 10.1016/j.conb.2011.12.007.
- 933 54. O'Rourke, E. J., Soukas, A. A., Carr, C. E. and Ruvkun, G. (2009). *C. elegans* major fats are  
934 stored in vesicles distinct from lysosome-related organelles. *Cell Metab.* 10, 430–435.  
935 10.1016/j.cmet.2009.10.002.
- 936 55. Escorcía, W., Ruter, D. L., Nhan, J. and Curran, S. P. (2018). Quantification of Lipid  
937 Abundance and Evaluation of Lipid Distribution in *Caenorhabditis elegans* by Nile Red and  
938 Oil Red O Staining. *JoVE* 133, e57352. 10.3791/57352.
- 939 56. Ruifrok, A.C. and Johnston, D.A. (2001). Quantification of histochemical staining by color  
940 deconvolution. *Anal. Quant. Cytol. Histol.* 23, 291–299.
- 941 57. You, Y. J., Kim, J., Raizen, D. M., and Avery, L. (2008). Insulin, cGMP, and TGF- $\beta$  signals  
942 regulate food intake and quiescence in *C. elegans*: a model for satiety. *Cell metabolism* 7,  
943 249-257. 10.1016/j.cmet.2008.01.005.
- 944 58. Gomez-Amaro, R.L., Valentine, E.R., Carretero, M., LeBoeuf, S.E., Rangaraju, S.,  
945 Broaddus, C.D., Solis, G.M., Williamson, J.R. and Petrascheck, M. (2015). Measuring food

- 946 intake and nutrient absorption in *Caenorhabditis elegans*. *Genetics* 200, 443–454.  
947 10.1534/genetics.115.175851.
- 948 59. Srinivasan, J., Durak, O. and Sternberg, P. W. (2008). Evolution of a polymodal sensory  
949 response network. *BMC Biol.* 6, 52. 10.1186/1741-7007-6-52.
- 950 60. Hong, R.L., Riebesell, M., Bumbarger, D.J., Cook, S.J., Carstensen, H.R., Sarpolaki, T.,  
951 Cochella, L., Castrejon, J., Moreno, E., Sieriebriennikov, B. and Hobert, O. (2019).  
952 Evolution of neuronal anatomy and circuitry in two highly divergent nematode species. *Elife*  
953 8, e47155. 10.7554/eLife.47155.
- 954 61. Hosmer, D. and Lemeshow, S. (2000). *Applied Logistic Regression*, 2<sup>nd</sup> edition (Wiley).
- 955 62. R Development Core Team (2017). R: a language and environment for statistical computing  
956 (R Foundation for Statistical Computing). <https://www.R-project.org/>
- 957 63. Bates, D., Maechler M., Bolker B., and Walker, S. (2015). Fitting Linear Mixed-Effects  
958 Models Using lme4. *J. Stat. Softw.* 67, 1-48. arXiv:1406.5823.
- 959 64. Hothorn, T. et al (2021). multcomp: Simultaneous Inference in General Parametric Models.  
960 <https://cran.r-project.org/web/packages/multcomp/index.html>

## 961 **Acknowledgments**

962 We thank Ralf Sommer, Ray Hong, and Cori Bargmann for strains; Karina Kono, Cassidy Pham,  
963 Shw Lew, and Lou Tames for their support roles; Kevin Curran and Suneer Verma for precursor  
964 work on *P. pacificus* biting; Ray Hong and Jagan Srinivasan for their expertise in *P. pacificus*;  
965 Mike Rieger for statistical advice; and Jing Wang, Jagan Srinivasan, Corinne Lee-Kubli, Adam  
966 Calhoun, Kenta Asahina, Robert Luallen, David O’Keefe, and members of the lab for their  
967 critical reading of the manuscript. This work was supported by National Institutes of Health  
968 5R01MH113905 (S.H.C.), W.M. Keck Foundation (S.H.C.), National Science Foundation  
969 (K.T.Q.), Salk Women & Science (K.T.Q.), and Paul F. Glenn Foundation Post-doctoral  
970 fellowship (K.T.Q.).

## 971 **Author contributions**

972 All experiments were conceived of and performed by K.T.Q. All analysis was done by K.T.Q.  
973 The manuscript was written by K.T.Q. and S.H.C.

## 974 **Declaration of interests**

975 The authors declare no competing interests

976 **Data and materials availability:**

977 The data that support the findings of this study are available from the corresponding author upon

978 reasonable request.

979 **Figure Legends**

980 **Figure 1. Nonfatal biting compels adult *C. elegans* to avoid bacteria occupied by *P.***

981 ***pacificus***

982 (A-C) Representative images of (A) young adult *P. pacificus*, (B) young adult *C. elegans*, and  
983 (C) larval *C. elegans* in L1 stage (earliest larval stage).

984 (D-G) Images showing (D) *P. pacificus* biting larval (L1) *C. elegans*, (E) leakage of  
985 pseudocoelomic fluid after fatal biting of larval *C. elegans*, (F) *P. pacificus* biting adult *C.*  
986 *elegans*, and (G) adult *C. elegans* escaping from a bite.

987 (H) Probability of *P. pacificus* killing different stages of *C. elegans* given a single bite (Wald  
988 test,  $n_{P.pacificus} = 12 - 16$ ,  $n_{\text{bites per } P.pacificus} = 3 - 39$ ). Individual data points are calculated as # kills  
989 / #bites for each *P. pacificus*.

990 (I) Cumulative percentage of *P. pacificus* animals that successfully killed adult *C. elegans* by  
991 various time points (Fisher's exact test with Benjamini-Hochberg adjustment,  $n_{P.pacificus} = 16$ ).

992 (J) Probability of feeding on bitten larva, across bacterial patch conditions (Wald test with  
993 single-step adjustment for Tukey contrasts,  $n_{P.pacificus} = 9-10$ ,  $n_{\text{bites per } P.pacificus} = 1-31$ ).

994 (K) Probability that adult *C. elegans* exits a bacterial patch after being bitten, across bacterial  
995 patch conditions (Wald test with single-step adjustment for Tukey contrasts,  $n_{P.pacificus} = 13-20$ ,  
996  $n_{\text{bites per } P.pacificus} = 1-15$ ).

997 (L-M) Percentage of time that an adult *C. elegans* spent with its (L) body fully inside and (M)  
998 only its head inside a bacterial patch that contained either only *C. elegans* or three *P. pacificus*  
999 animals (Wilcoxon's signed rank test (paired) and Dunn's test (unpaired) with Benjamini-  
1000 Hochberg adjustment,  $n_{C. elegans} = 11$ ).

1001 (N) Average time that adult *C. elegans* spent avoiding a bacterial patch immediately after a bite  
1002 (Wilcoxon's signed rank test,  $n_{C. elegans} = 9$ ).

1003 (H,J,K) Means and error bars are predicted probabilities and 95% confidence intervals from  
1004 binomial logistic regression models of data.

1005 All other error bars are 95% bootstrap confidence intervals. \*  $p < 0.5$ , \*\*  $p < 0.01$ , \*\*\*  $p < 0.001$ ,  
1006 \*\*\*\*  $p < 0.0001$ .

1007 **Figure 2. Progeny of predator-exposed adult *C. elegans* experience reduced access to**  
1008 **bacteria**

1009 (A) Egg distribution assay. A mix of 4 adult *C. elegans* and *P. pacificus* laid eggs for 7 hours in  
1010 an arena with a small bacterial patch. For each egg, species identity and distance from the center  
1011 of the patch were determined.

1012 (B) Actual locations of eggs, pooled within the particular mix corresponding to same-row plots  
1013 in (C). Outer concentric circle represents the arena bounds; inner concentric circle represents the  
1014 bacterial patch.

1015 (C) Distributions of the radial distances of eggs laid by different mixes of adult *C. elegans* (left)  
1016 and *P. pacificus* (right), relative to the center of a bacterial patch. Light-colored histograms  
1017 represent egg distribution in individual arenas, while dark-colored histograms represent egg  
1018 distribution pooled across all arenas. Light yellow shading indicates the radius (1 mm) of the  
1019 bacterial patch. Egg distributions were compared within egg species (Wald test with single-step  
1020 adjustment for Tukey contrasts,  $n_{\text{arena}} = 10 - 20$ ).

1021 (D) Percentage of *C. elegans* eggs that are laid off the bacterial patch (Wald test with single-step  
1022 adjustment for Tukey contrasts,  $n_{\text{arena}} = 10 - 20$ ,  $n_{\text{eggs per arena}} = 12 - 166$ ).

1023 (E) Mean distance of *C. elegans* eggs for different mixes of adult *C. elegans* and *P. pacificus*  
1024 (Dunn's test,  $n_{\text{arena}} = 10-20$ ).

1025 (F) Percentage of newly hatched larvae that find a small bacterial patch within 36 hours from  
1026 various starting distances (Wald test with single-step adjustment for Tukey contrasts,  $n_{\text{arena}} = 9$ ,  
1027  $n_{\text{larvae per arena}} = 10-11$ ).

1028 (G) Egg distribution assay, with extended egg-laying time (36 hours) and increased maximum  
1029 distance from the small bacterial patch (42.5 mm). Progeny within 10 mm of the patch were  
1030 counted.

1031 (H) Number of *C. elegans* progeny (purple dots) and *P. pacificus* progeny (green dots), per adult,  
1032 within 10 mm of a small patch (Dunn's test,  $n_{\text{arena}} = 29-30$ ).

1033 (D,F) Means and error bars are predicted probabilities and 95% confidence intervals from  
1034 binomial logistic regression models of data.

1035 All other error bars are 95% bootstrap confidence intervals. \*  $p < 0.5$ , \*\*  $p < 0.01$ , \*\*\*  $p < 0.001$ ,  
1036 \*\*\*\*  $p < 0.0001$ .

1037 **Figure 3. *P. pacificus* inflicts non-fatal biting to achieve territorial outcomes**

1038 (A) Percentage of *P. pacificus* body stained with Oil Red O after 6 hours on different diets

1039 (Dunn's test with Benjamini-Hochberg adjustment,  $n_{P. pacificus} = 60-117$ ).

1040 (B) Probability of *P. pacificus* switching from one food source to an alternate food source

1041 (Fisher's exact test with Benjamini-Hochberg adjustment,  $n_{P. pacificus} = 29-39$ ).

1042 (C) Percentage of a bacterial patch remaining after placing a single adult *C. elegans* or *P.*

1043 *pacificus* on the patch (Dunn's test with Benjamini-Hochberg adjustment,  $n_{adult} = 16-23$ ).

1044 (D) Model of how biting valuation should adjust to different *C. elegans* targets and bacterial

1045 abundances. Expected utility of biting is calculated as the sum of the utilities (subjective values)

1046 of potential biting outcomes (predatory or territorial), weighted by their respective probabilities.

1047 Therefore, expected utility of biting has both a predatory component and a territorial component.

1048 White, light yellow, and dark yellow shading represent negligible, scarce, and plentiful

1049 subranges, respectively, of bacterial abundance. Dashed lines represent expected utility of biting

1050 when bacteria abundance is negligible, with vertical arrows indicating predicted direction of

1051 change in expected utility of biting. Sloped arrows represent predicted monotonic decreases in

1052 expected utility of biting. Bacterial abundance and utility are in arbitrary units.

1053 (E) Probability that *P. pacificus* bites given an encounter with larval *C. elegans* (Wald test with

1054 single-step adjustment for Tukey contrasts,  $n_{P. pacificus} = 9-10$ ,  $n_{encounters\ per\ P. pacificus} = 1-66$ . Red

1055 line highlights similarity to the shape predicted for predatory biting in (D).

1056 (F) Probability that *P. pacificus* bites given an encounter with adult *C. elegans* (Wald test with

1057 single-step adjustment for Tukey contrasts,  $n_{P. pacificus} = 12-34$ ,  $n_{encounters\ per\ P. pacificus} = 1-38$ ). Blue

1058 line highlights similarity to the shape predicted for territorial biting in (D).

1059 (E,F) Means and error bars are predicted probabilities and 95% confidence intervals from

1060 binomial logistic regression models of data.

1061 All other error bars are 95% bootstrap confidence intervals. ns  $p > 0.05$ , \*  $p < 0.05$ , \*\*  $p < 0.01$ , \*\*\*

1062  $p < 0.001$ , \*\*\*\*  $p < 0.0001$ .

1063 **Figure 4. Territorial biting is driven by chemosensation and mechanosensation of bacteria**

1064 (A) DiO-stained chemosensory amphid neurons of *P. pacificus*. Dashed line demarcates head  
1065 silhouette.

1066 (B) Difference in  $p(\text{bite}|\text{encounter})$  between mock-ablated (mean centered at zero) and neuron-  
1067 ablated *P. pacificus*, with an adult *C. elegans* target on a scarce bacterial lawn (Wald test with  
1068 Benjamini-Hochberg adjustment,  $n_{P. pacificus} = 5-31$ ,  $n_{\text{encounters per } P. pacificus} = 2-27$ ).

1069 (C) Probability that *P. pacificus* bites given an encounter with adult *C. elegans* on a patch of  
1070 Sephadex beads (Wald test with single-step adjustment for Tukey contrasts,  $n_{P. pacificus} = 7-13$ ,  
1071  $n_{\text{encounters per } P. pacificus} = 1-14$ ).

1072 (D, E) Timecourse of *P. pacificus* residence on a 1 mm patch consisting of (D) low-density  
1073 bacteria or (E) Sephadex beads.

1074 (F) Change in *P. pacificus* patch residence time for edible (low-density bacteria) and inedible  
1075 (beads) low-residence patches (Wilcoxon's signed rank test with Benjamini-Hochberg  
1076 adjustment,  $n_{P. pacificus} = 11-14$ ).

1077 (B,C) Means and error bars are predicted probabilities and 95% confidence intervals from  
1078 binomial logistic regression models of data.

1079 All other error bars are 95% bootstrap confidence intervals. \*  $p < 0.5$ , \*\*  $p < 0.01$ , \*\*\*  $p < 0.001$ ,  
1080 \*\*\*\*  $p < 0.0001$ .

1081 **Figure 5. Predatory and territorial biting are associated with different search tactics**

1082 (A) Location of *P. pacificus* mouth was tracked during exploration of a bacterial patch.

1083 Translational distance was calculated as the total x-y distance traveled. Patrol distance was  
1084 calculated as the forward radial distance traveled while *P. pacificus* explores the patch boundary.

1085 (B-D) Tracks of *P. pacificus* mouth while cohabiting a patch with (B) another *P. pacificus*, (C)  
1086 larval *C. elegans*, and (D) adult *C. elegans*.

1087 (E) Translational and patrol speeds of *P. pacificus* with different cohabitants (Tukey's HSD test,  
1088  $n_{P. pacificus} = 6-10$ ).

1089 (F) Patrol speed as a proportion of translational speed, to discount paused exploration while  
1090 feeding on larvae (Dunn's test with Benjamini-Hochberg adjustment,  $n_{P. pacificus} = 6-10$ ).

1091 (G) Prey-feeding duration was expected to be longer on bacteria-rich patches (top) compared to  
1092 bacteria-poor patches (bottom).

1093 (H,I) Light and dark yellow shading indicates low- and high-residence patches, respectively (See  
1094 fig. S7A).

1095 (H) Average prey-feeding time per bite (Dunn's test with Benjamini-Hochberg adjustment,  $n_{adult}$   
1096 = 10).

1097 (I) Frequency of *P. pacificus* encounter with larval *C. elegans* (Dunn's test with Benjamini-  
1098 Hochberg adjustment,  $n_{P. pacificus} = 10$ ).

1099 All error bars are 95% bootstrap confidence intervals. \*  $p < 0.5$ , \*\*  $p < 0.01$ , \*\*\*  $p < 0.001$ , \*\*\*\*  
1100  $p < 0.0001$ .



1101 **Figure 6. Blocking dopamine D2 or octopamine receptors modulates territorial biting**  
1102 (A,B)  $p(\text{bite}/\text{encounter})$  for *P. pacificus* treated with (A) the dopamine D2 receptor antagonist,  
1103 amisulpride (Wald test with Benjamini-Hochberg adjustment,  $n_{P. pacificus} = 9-18$ ,  $n_{\text{encounters per } P.}$   
1104  $pacificus} = 24-42$ ), and (B) the octopamine receptor antagonist, epinastine (Wald test with  
1105 Benjamini-Hochberg adjustment,  $n_{P. pacificus} = 9-11$ ,  $n_{\text{encounters per } P. pacificus} = 9-38$ ).  
1106 (C,D) Effect of epinastine on (C) translational and patrol speeds, and on (D) patrol speed as a  
1107 proportion of translational speed (Dunn's test,  $n_{P. pacificus} = 29-37$ ).  
1108 (E) *P. pacificus* selects the predatory foraging strategy against larval *C. elegans*, and selects the  
1109 territorial foraging strategy against adult *C. elegans*. Each foraging strategy consists of repeating  
1110 cycles of four stages: bite → biting outcome → search for *C. elegans* → encounter *C. elegans*.  
1111 Dark yellow, light yellow, and white concentric circles represent plentiful, scarce, and negligible  
1112 bacterial abundance, respectively. Solid, dashed, and dotted arrows indicate highest,  
1113 intermediate, and lowest probabilities, respectively, of achieving the next step.  
1114 (A-D) Drug concentrations refer to the concentration of drug solution applied to a bacterial patch  
1115 for treatment (see Methods: Drug treatment).  
1116 (A,B) Means and error bars are predicted probabilities and 95% confidence intervals from  
1117 binomial logistic regression models of data.  
1118 All other error bars are 95% bootstrap confidence intervals. \*  $p < 0.5$ , \*\*  $p < 0.01$ , \*\*\*  $p < 0.001$ ,  
1119 \*\*\*\*  $p < 0.0001$ .

**Figure 1**

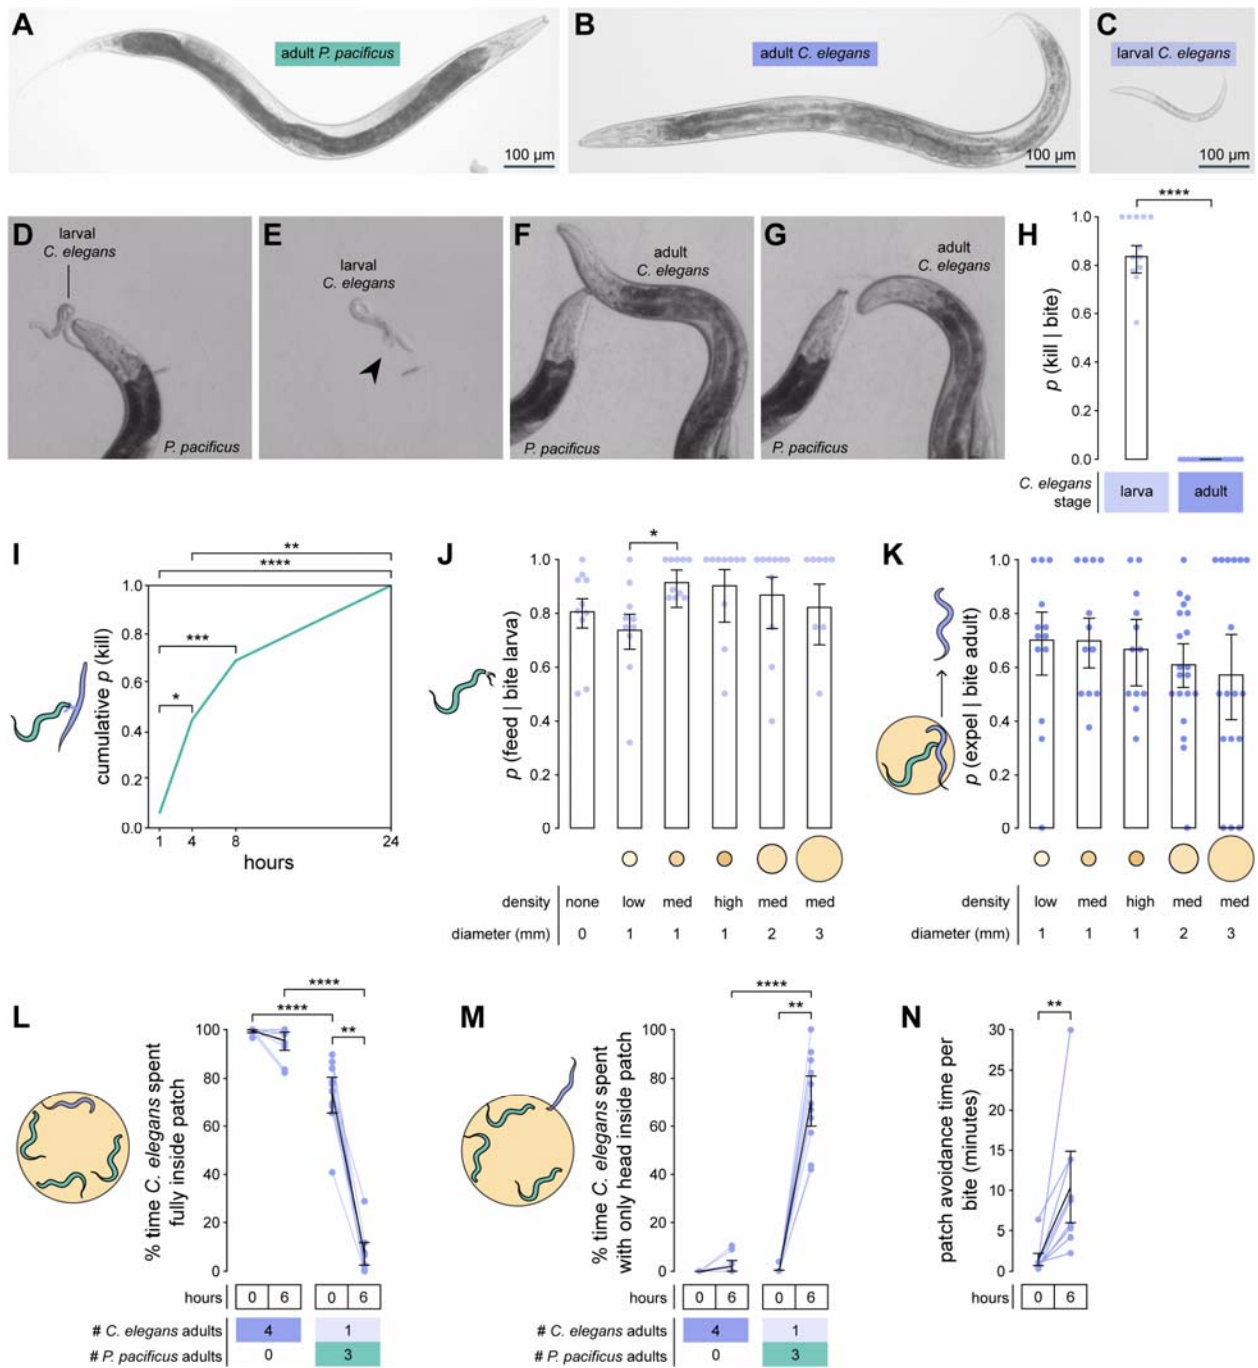

**Figure 2**

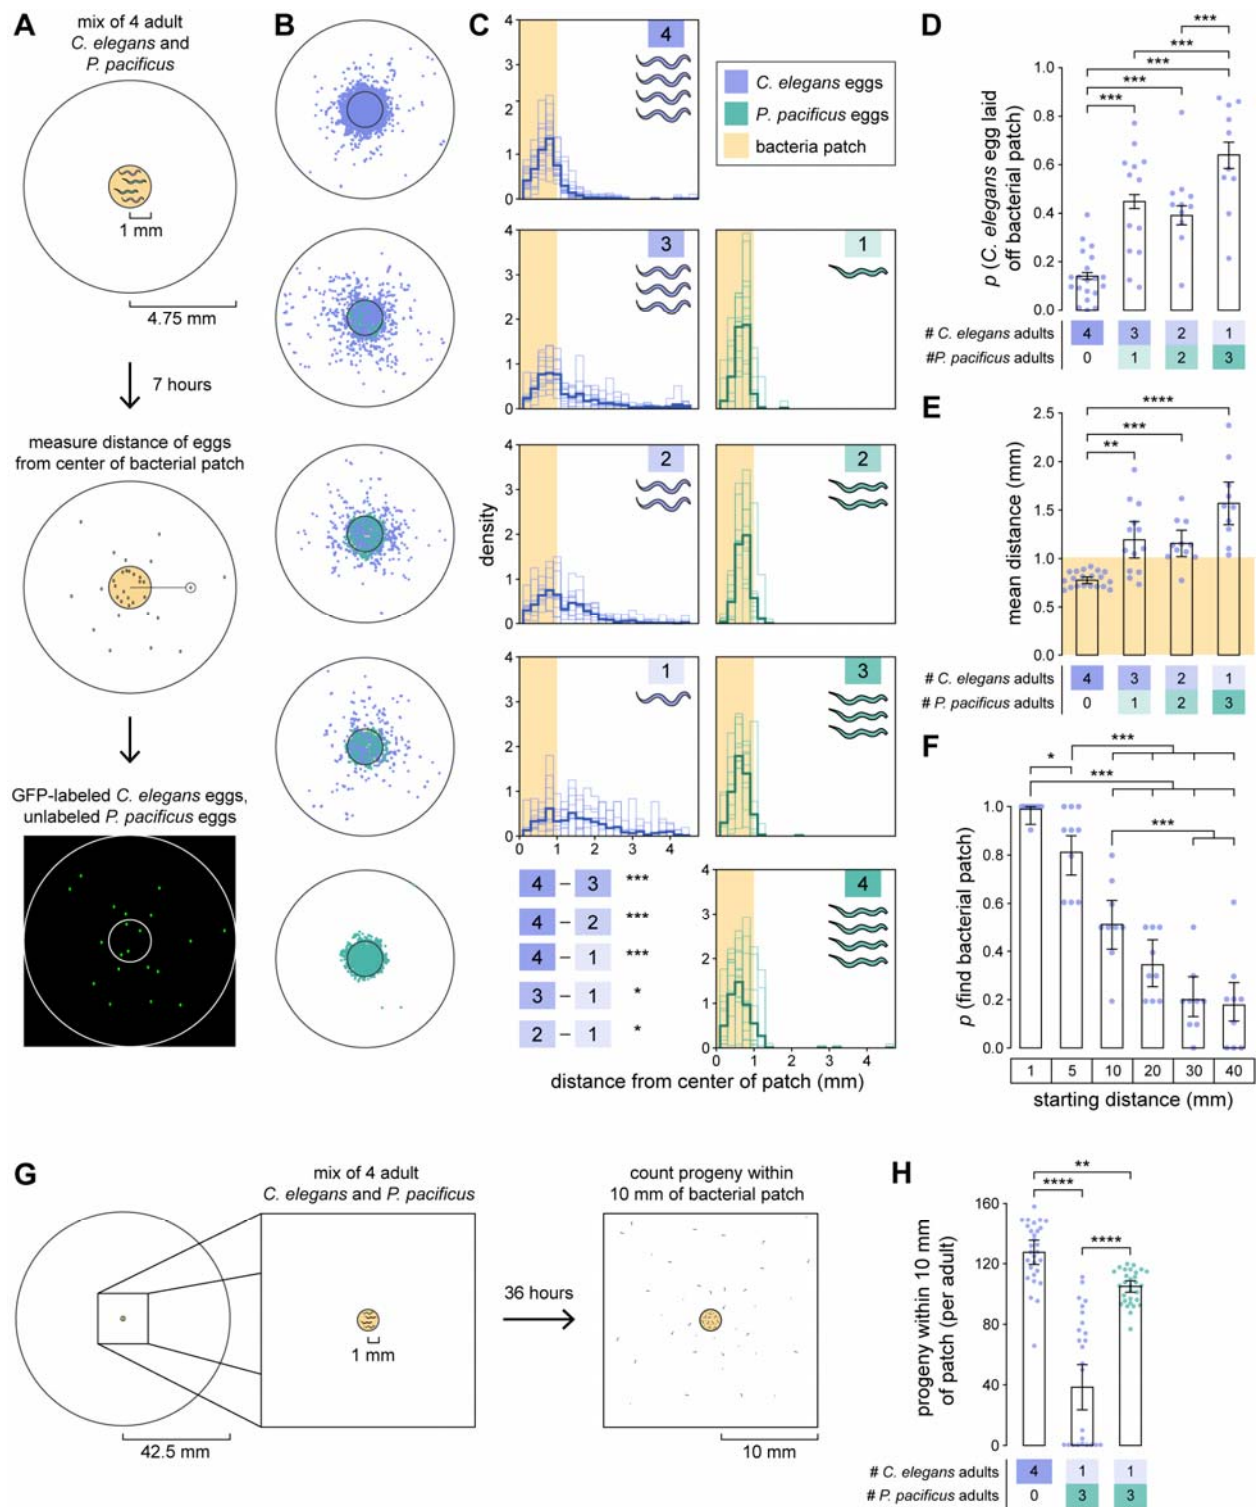

**Figure 3**

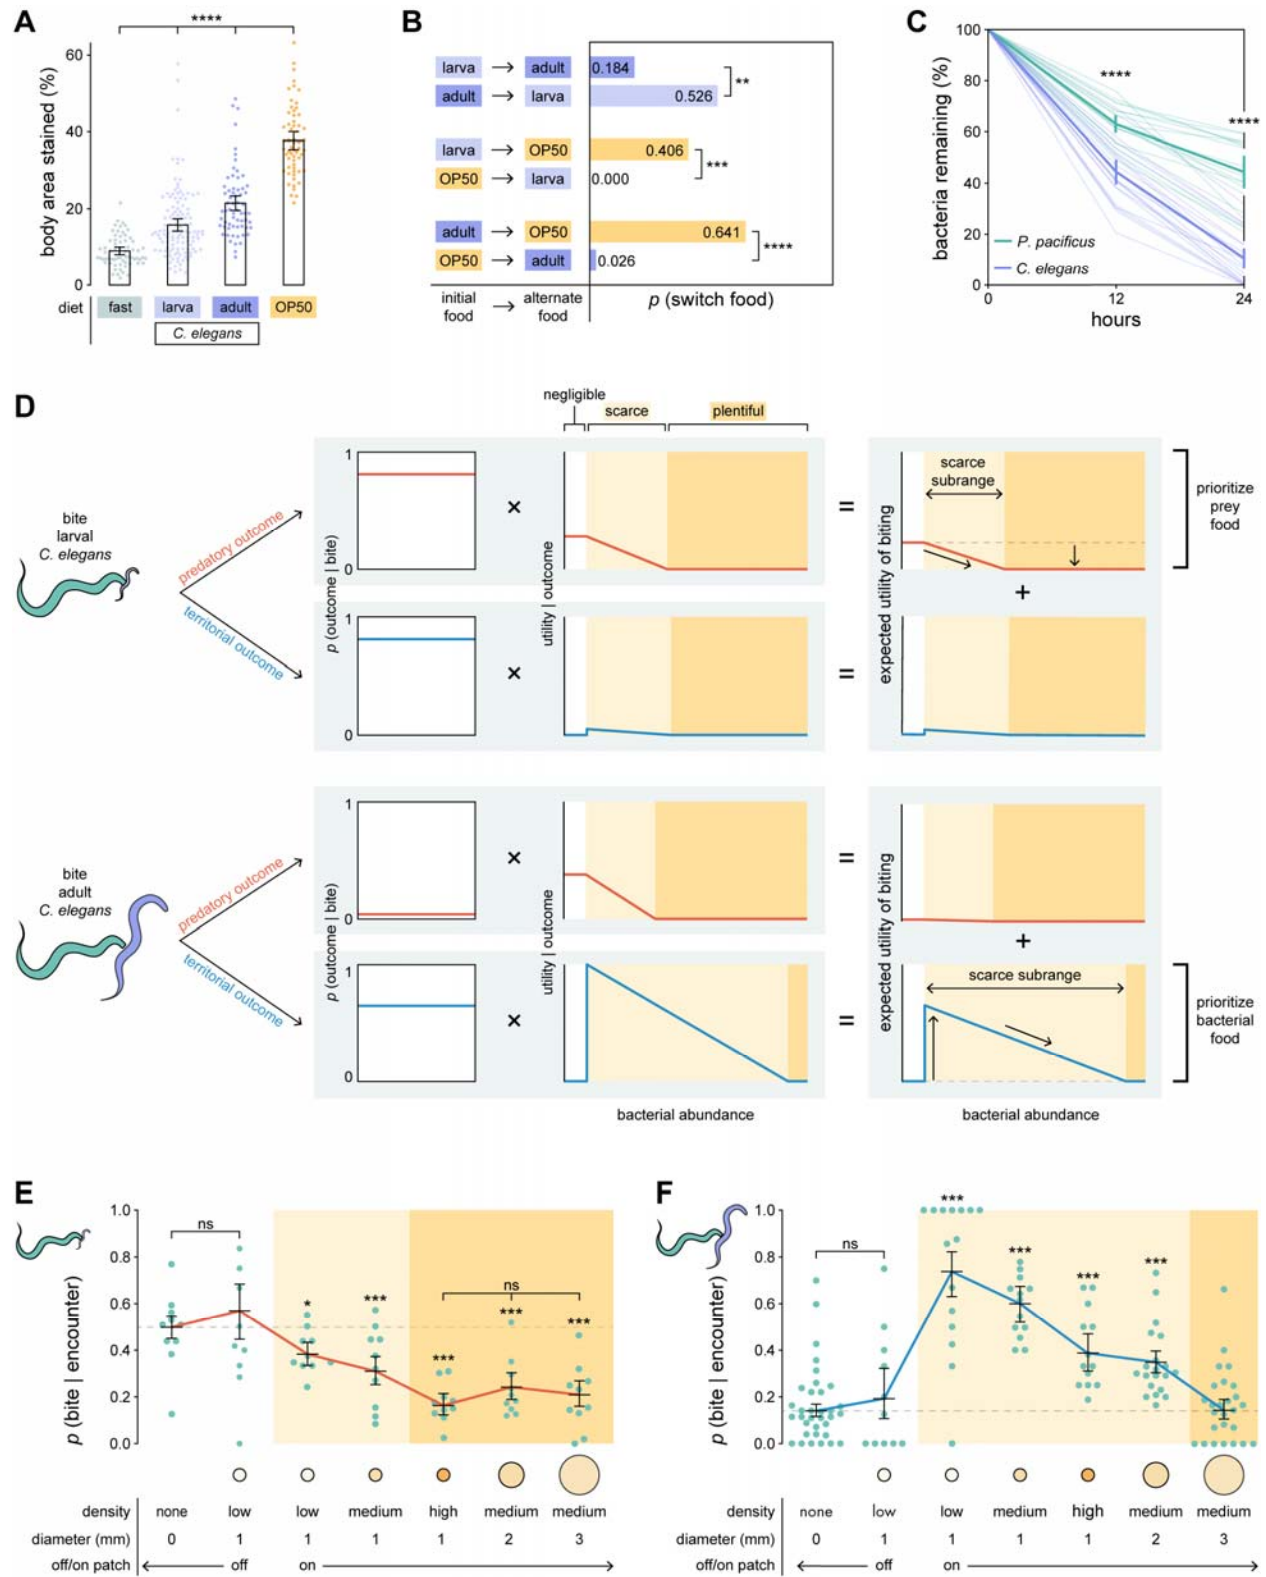

**Figure 4**

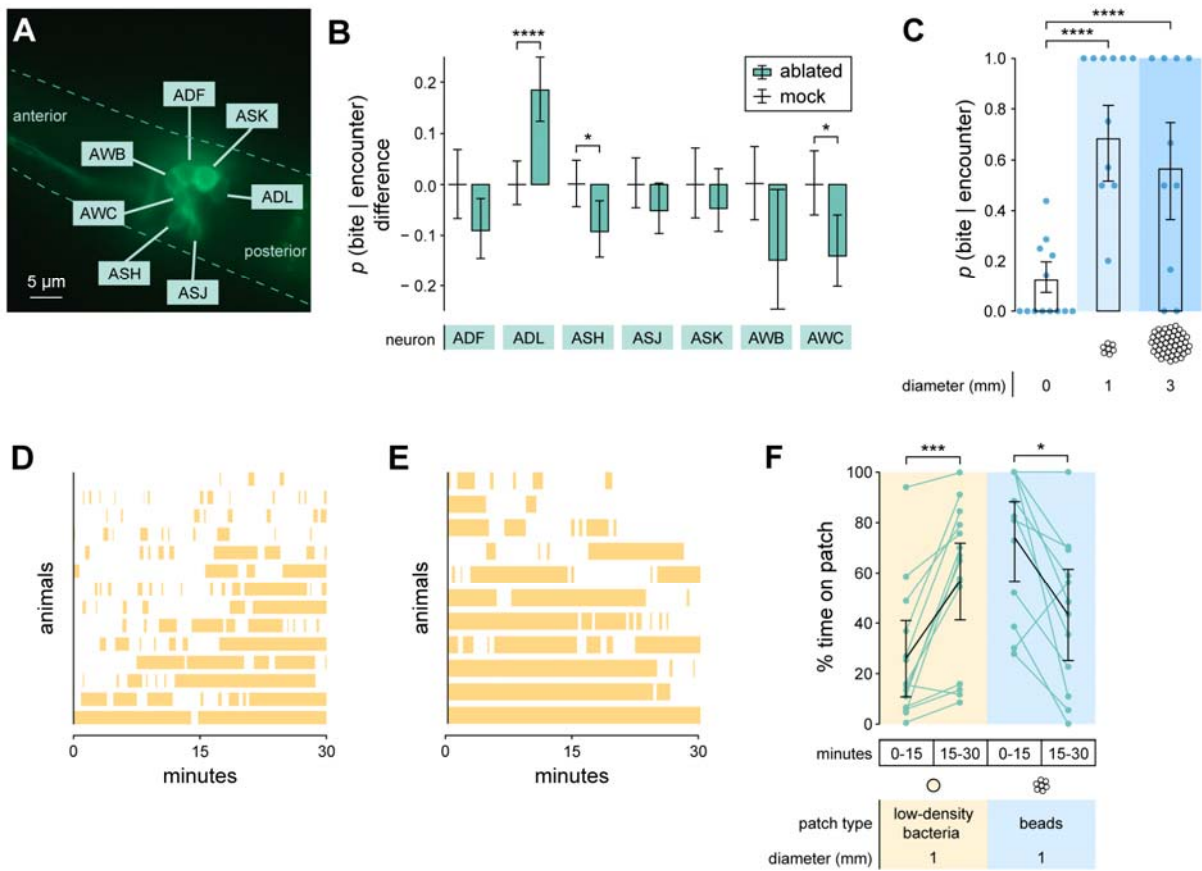

**Figure 5**

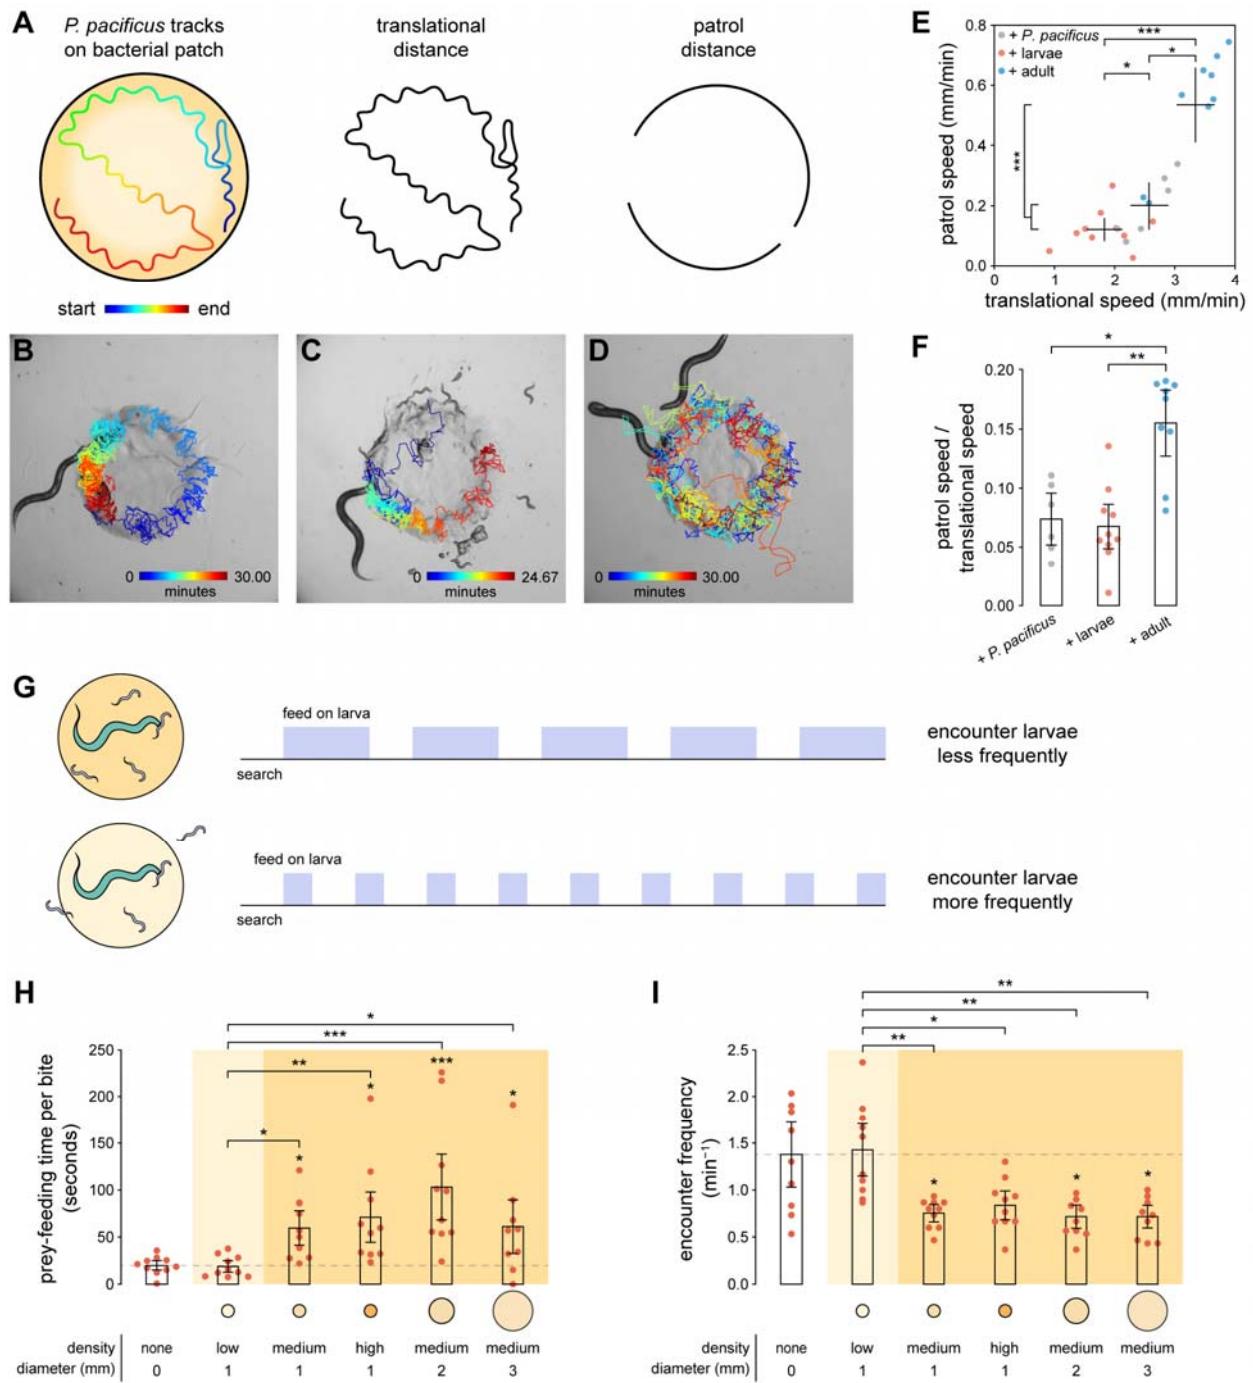

**Figure 6**

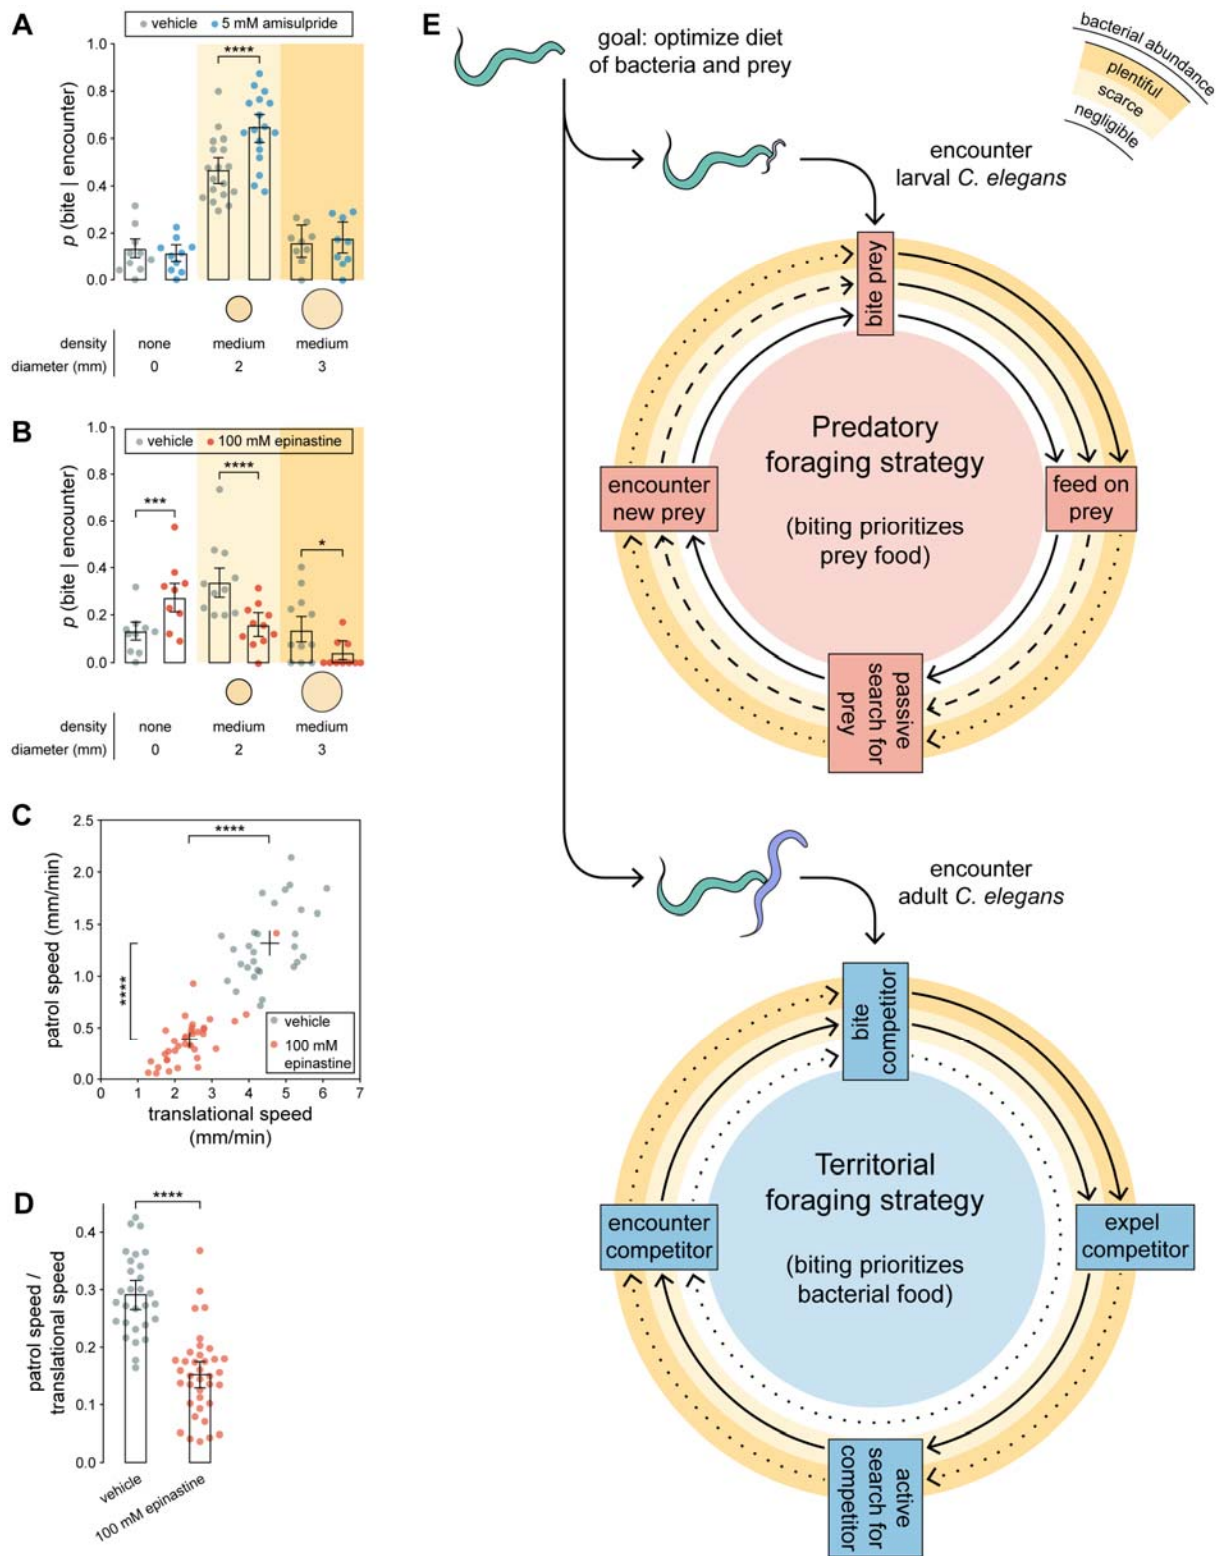

Source: https://www.biorxiv.org/content/10.1101/2021.03.09.434602v3.full.pdf
